# Supplementary material for: Discovering potent inhibitors against c-Met kinase: molecular design, organic synthesis and bioassay
Source: Royal Society of Chemistry journal article supplement (doi:10.1039/c1ob06186k), 2011-09-30

## **Discovering potent inhibitors against c-Met kinase: molecular design, organic synthesis and bioassay**

Zhongjie Liang<sup>a#</sup>, Xiao Ding<sup>a#</sup>, Jing Ai<sup>b#</sup>, Xiangqian Kong<sup>a</sup>, Limin Chen<sup>a</sup>, Cheng Luo<sup>a,c\*</sup>, Meiyu Geng<sup>b\*</sup>, Hong Liu<sup>a\*</sup>, Kaixian Chen, and Hualiang Jiang<sup>a</sup>

<sup>a</sup>Drug Discovery and Design Center, <sup>b</sup>Division of Anti-Tumor Pharmacology, State Key Laboratory of Drug Research, Shanghai Institute of Materia Medica, Chinese Academy of Sciences, Shanghai 201203, China. <sup>c</sup>Center for Systems Biology, Soochow University, 215006, China.

<sup>#</sup>These authors contributed equally to this study.

\*Correspondence: Cheng Luo, Meiyu Geng and Hong Liu

Tel: +86-21-50806600; Fax: +86-21-50807188

E-mail: [cluo@mail.shnc.ac.cn](mailto:cluo@mail.shnc.ac.cn) or [mygeng@mail.shnc.ac.cn](mailto:mygeng@mail.shnc.ac.cn) or [hliu@mail.shnc.ac.cn](mailto:hliu@mail.shnc.ac.cn)

**Table S1 The HPLC analyses of all the target compounds. The purity of identified compounds that was essential to the conclusions drawn in the text and determined by the instrumentation with one system given in the following table. The peak purity was checked with UV spectra.**

|                         | <b>Method</b>                                                                                                                                                     |                             |                            |
|-------------------------|-------------------------------------------------------------------------------------------------------------------------------------------------------------------|-----------------------------|----------------------------|
| <b>Equipment</b>        | Agilent 1100 with binary pump, photodiode array detector (DAD), ESI and APCI mass spectrometer                                                                    |                             |                            |
| <b>Column</b>           | Agilent Zorbax Exlipse SB-C <sub>18</sub> (25×4.6mm, 5µm particle size)                                                                                           |                             |                            |
| <b>System condition</b> | CH <sub>3</sub> OH / H <sub>2</sub> O, 80 %(v/v) of CH <sub>3</sub> OH gradient, flow rate: 1.0 ml/min, calculated the relative purity of each compound at 254 nm |                             |                            |
| <b>Results</b>          | <b>Compd</b>                                                                                                                                                      | <b>Retention time (min)</b> | <b>Relative purity (%)</b> |
|                         | <b>1a</b>                                                                                                                                                         | <b>1.428</b>                | <b>100.00</b>              |
|                         | <b>1b</b>                                                                                                                                                         | 1.562                       | 100.00                     |
|                         | <b>1c</b>                                                                                                                                                         | 1.125                       | 98.22                      |
|                         | <b>1d</b>                                                                                                                                                         | 6.235                       | 96.12                      |
|                         | <b>1e</b>                                                                                                                                                         | 6.336                       | 97.55                      |
|                         | <b>1f</b>                                                                                                                                                         | 1.978                       | 100.00                     |
|                         | <b>1g</b>                                                                                                                                                         | 1.235                       | 100.00                     |
|                         | <b>1h</b>                                                                                                                                                         | 1.637                       | 100.00                     |
|                         | <b>1i</b>                                                                                                                                                         | 1.542                       | 97.46                      |
|                         | <b>1j</b>                                                                                                                                                         | 1.723                       | 100                        |
|                         | <b>1k</b>                                                                                                                                                         | 5.359                       | 100                        |
|                         | <b>1l</b>                                                                                                                                                         | 5.369                       | 95.26                      |
|                         | <b>1m</b>                                                                                                                                                         | 1.023                       | 100.00                     |
|                         | <b>1n</b>                                                                                                                                                         | 1.365                       | 95.29                      |
|                         | <b>1o</b>                                                                                                                                                         | 1.412                       | 98.22                      |
| <b>1p</b>               | 1.725                                                                                                                                                             | 97.81                       |                            |

|  |           |       |        |
|--|-----------|-------|--------|
|  | <b>1q</b> | 1.685 | 97.36  |
|  | <b>1r</b> | 1.632 | 100.00 |
|  | <b>5a</b> | 1.874 | 100.00 |
|  | <b>5b</b> | 1.123 | 95.13  |
|  | <b>5c</b> | 5.892 | 95.96  |
|  | <b>5d</b> | 5.356 | 96.23  |
|  | <b>5e</b> | 1.215 | 100.00 |
|  | <b>5f</b> | 1.921 | 100.00 |
|  | <b>5g</b> | 1.326 | 99.15  |

### Copies of $^1\text{H}$ NMR of all the target compounds

**2-chloro-5-(5-((1-(4-(methoxycarbonyl)phenyl)-3,5-dioxypyrazolidin-4-ylidene)methyl)furan-2-yl)benzoic acid (No. 1a).**

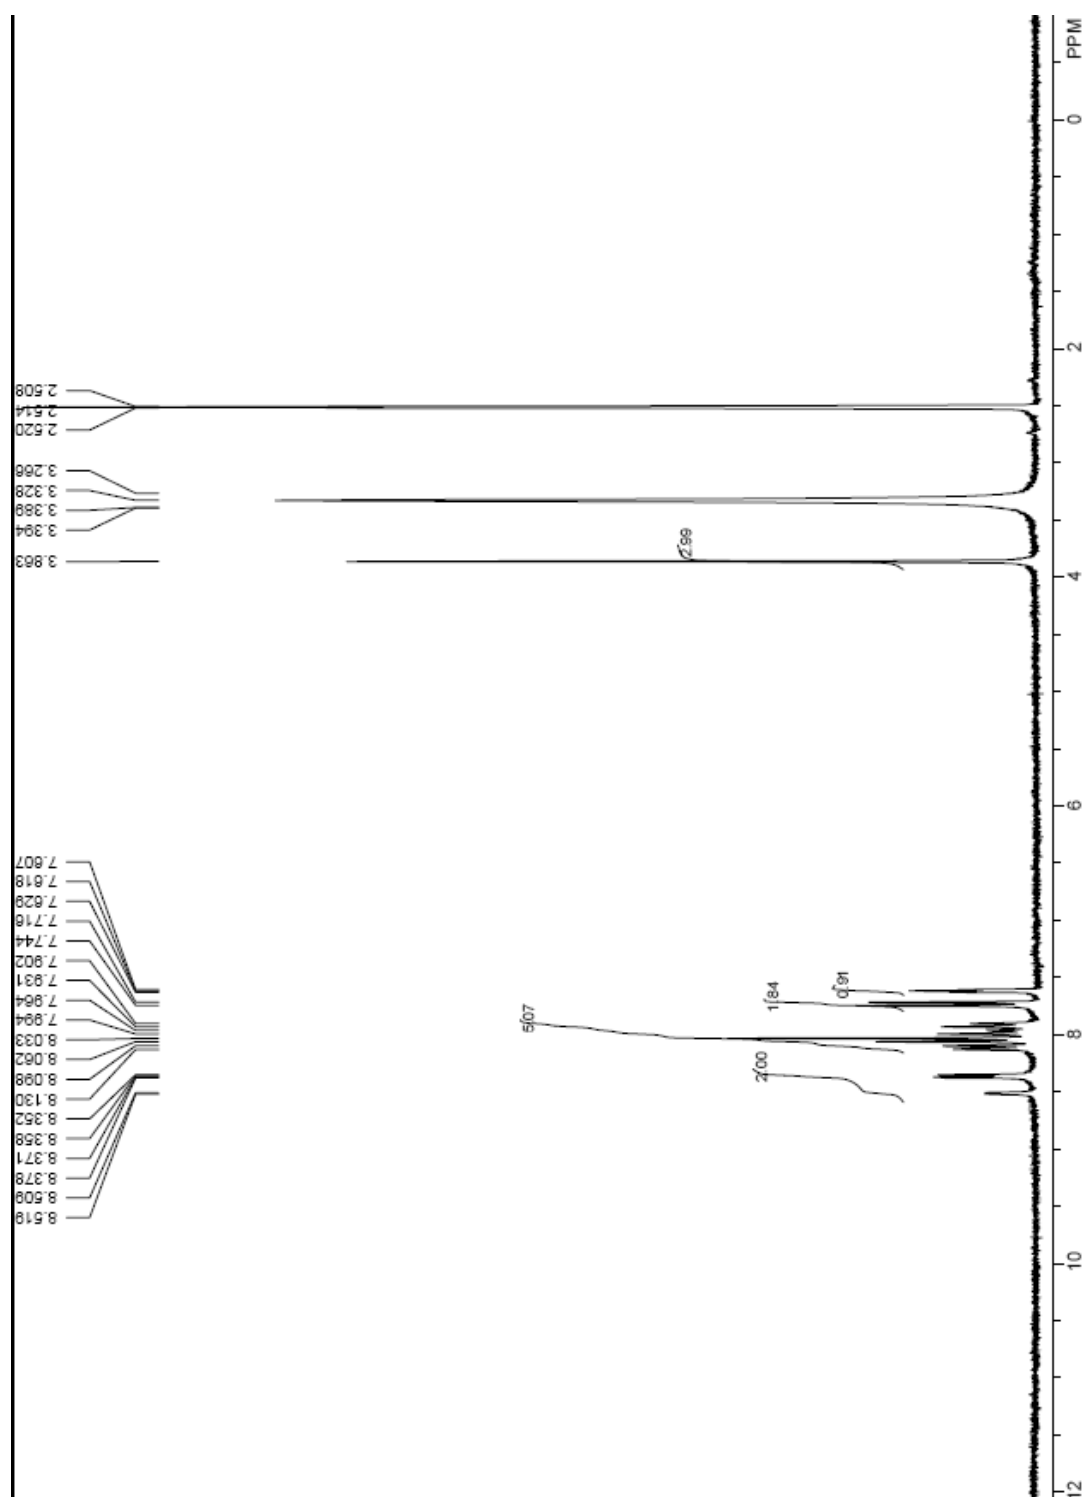

**3-(5-((1-(4-(Methoxycarbonyl)phenyl)-3,5-dioxopyrazolidin-4-ylidene)methyl)fur  
an-2-yl)benzoic acid (No. 1b).**

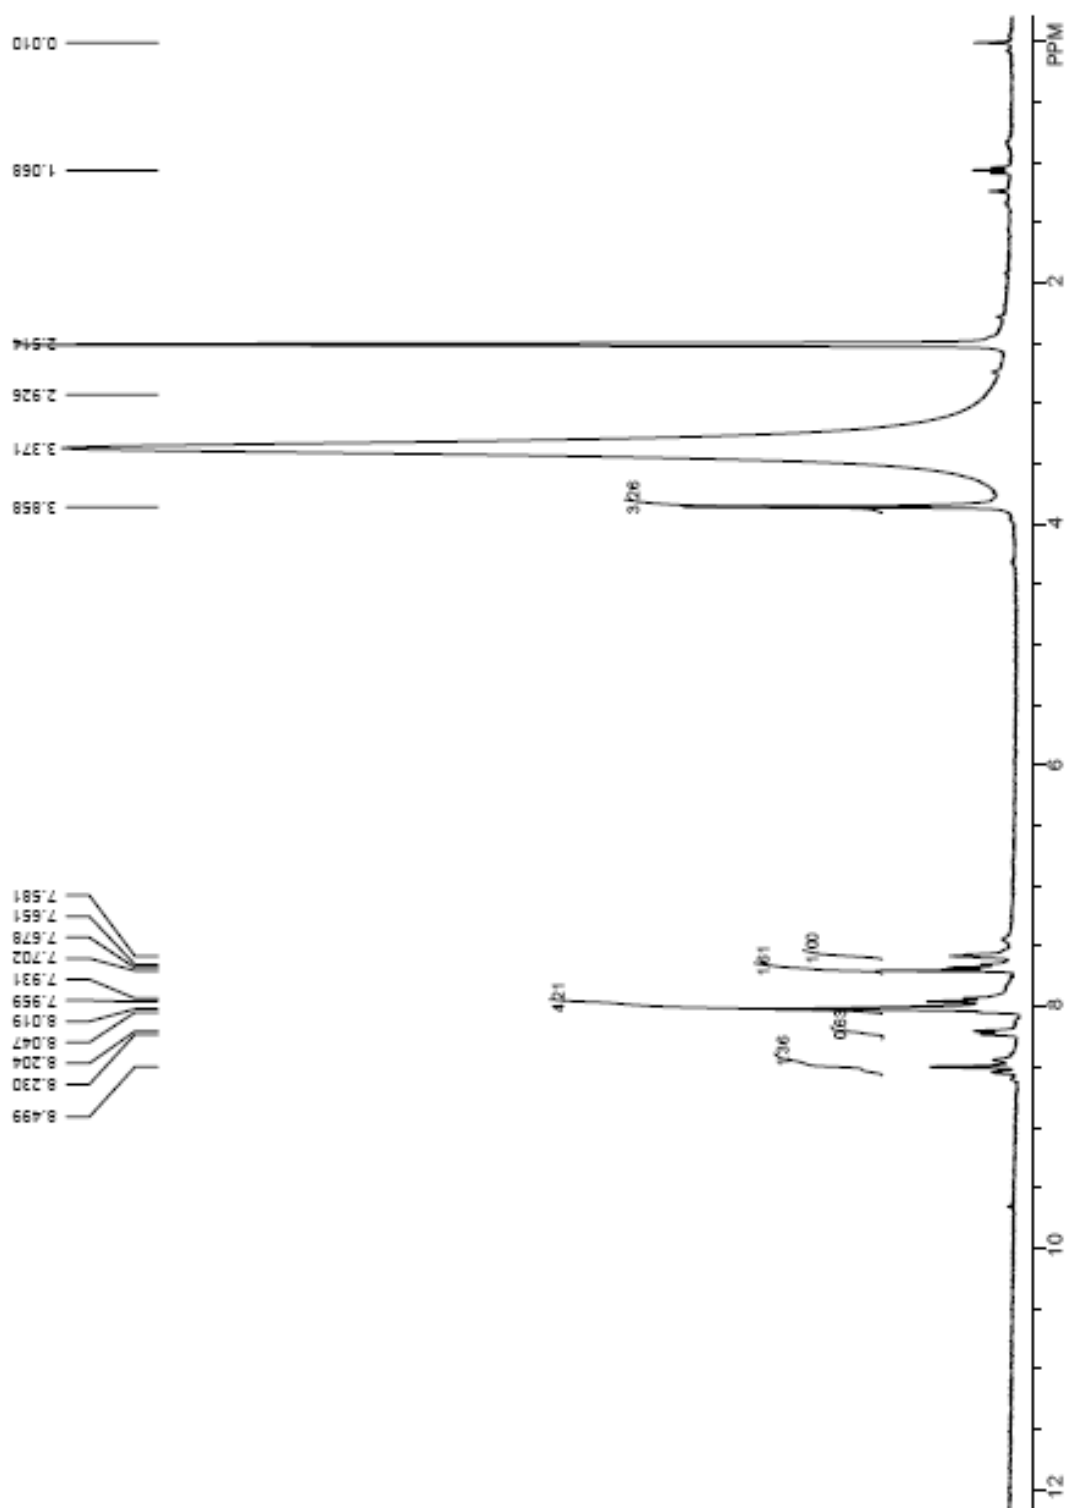

### 3-(5-((1-(4-(Ethoxycarbonyl)phenyl)-3,5-dioxypyrazolidin-4-ylidene)methyl)fura

n-2-yl)benzoic acid (No. 1c).

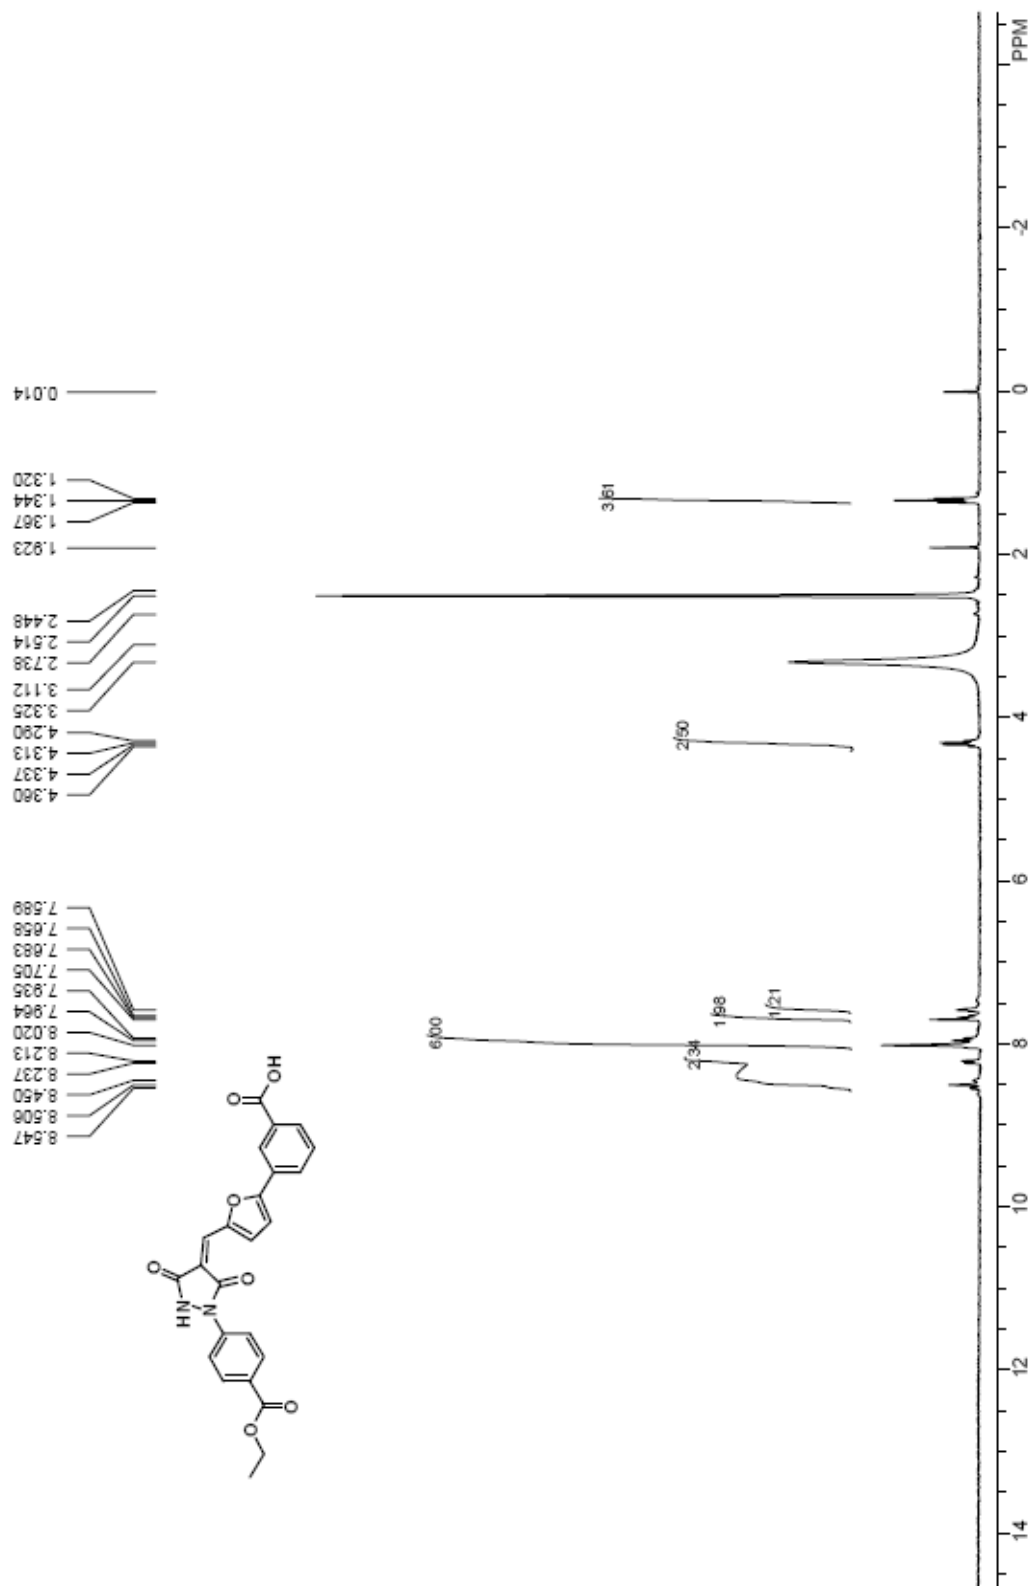

### Ethyl 2-chloro-5-(5-((3,5-dioxo-1-p-tolylpyrazolidin-4-ylidene)methyl)furan-2-yl

)benzoate (No. 1d).

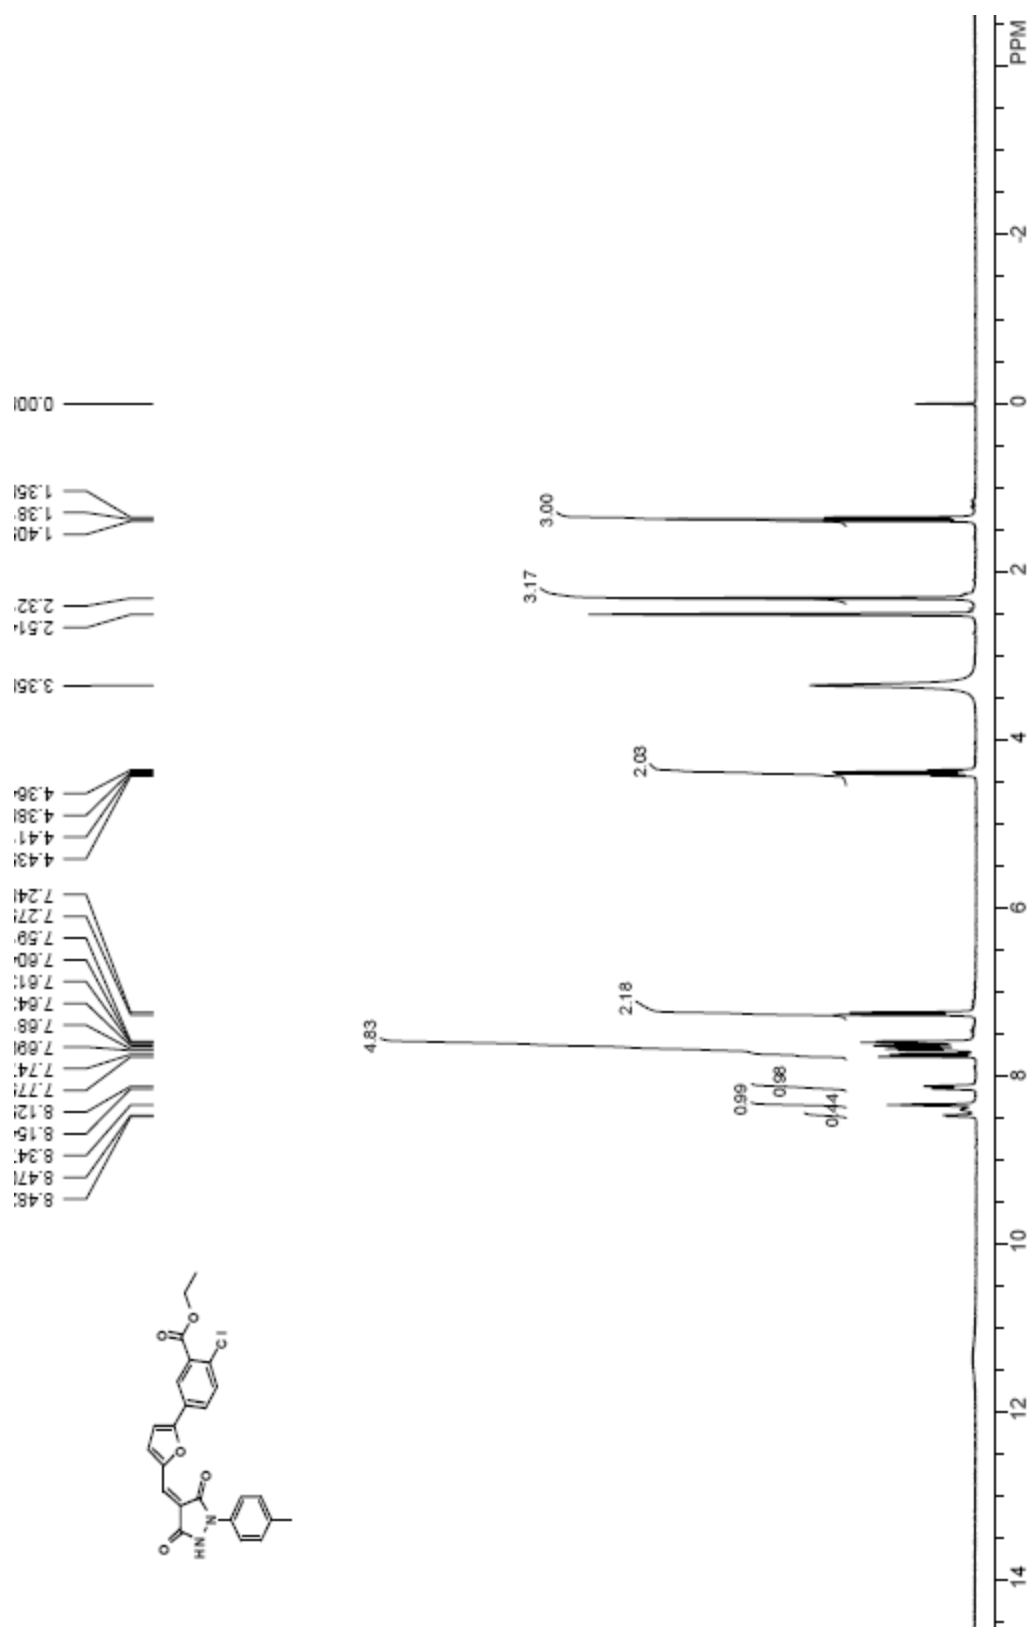

**Methyl 2-chloro-5-(5-((3,5-dioxo-1-p-tolylpyrazolidin-4-ylidene)methyl)furan-2-yl)benzoate (No. 1e).**

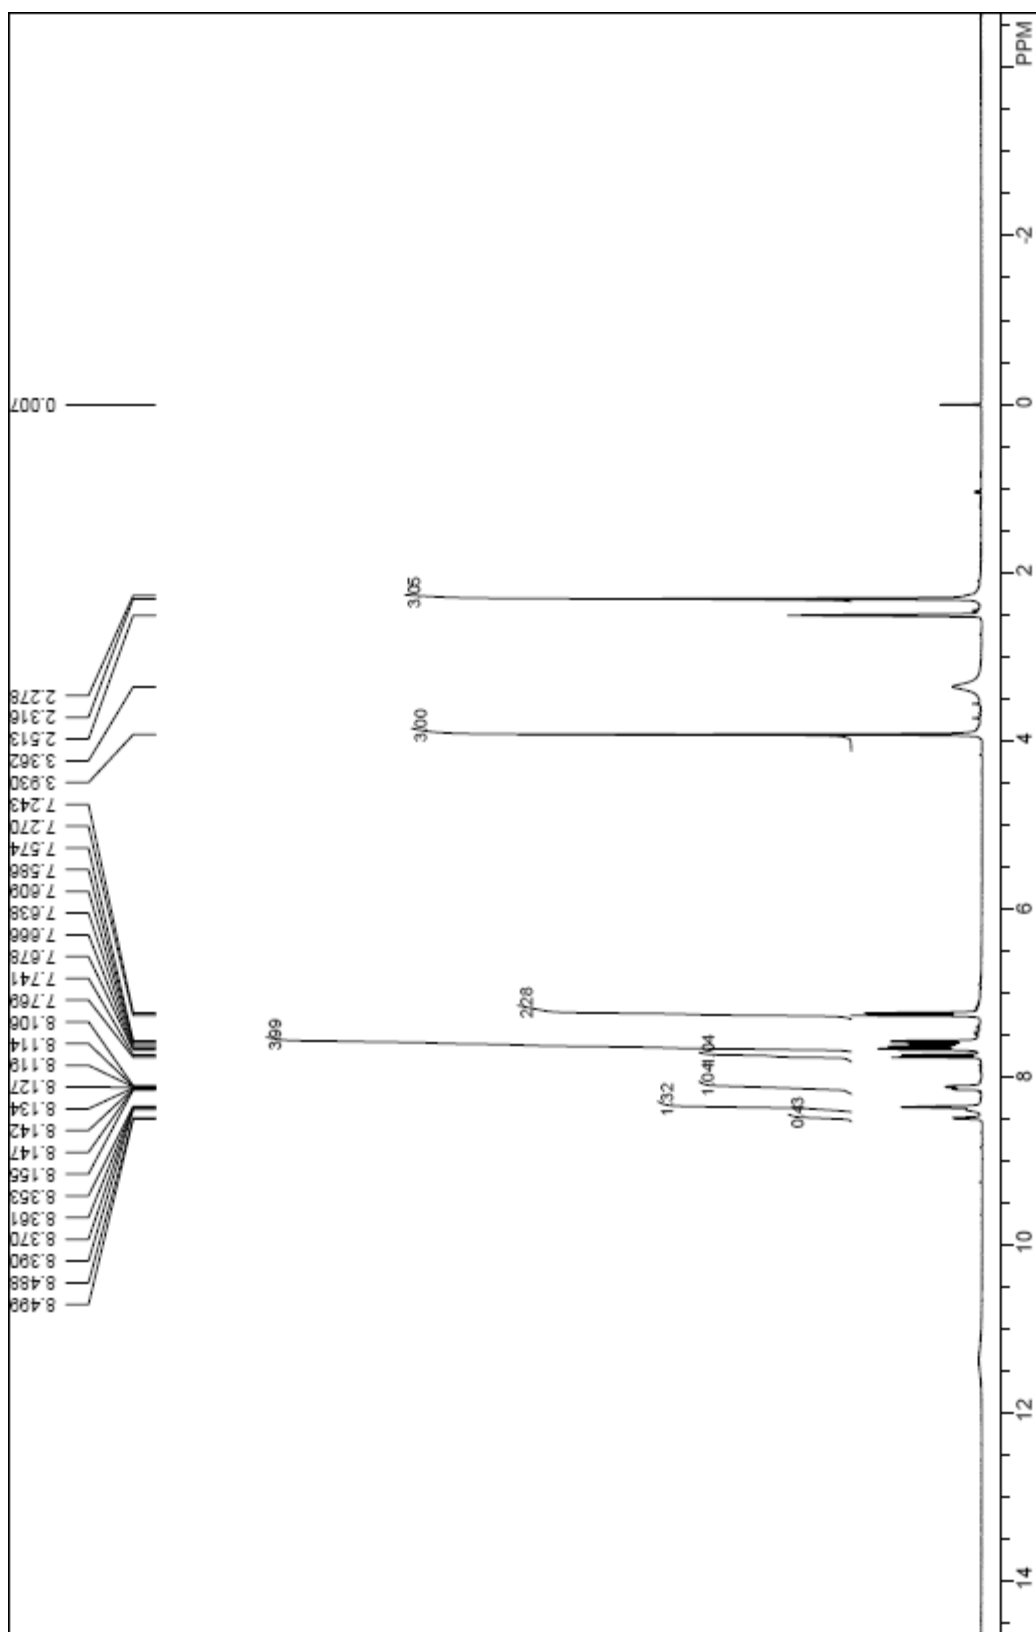



**2-Fluoro-5-(5-((1-(4-methoxyphenyl)-3,5-dioxopyrazolidin-4-ylidene)methyl)furan-2-yl)benz**

**oic acid (No. 1f).**

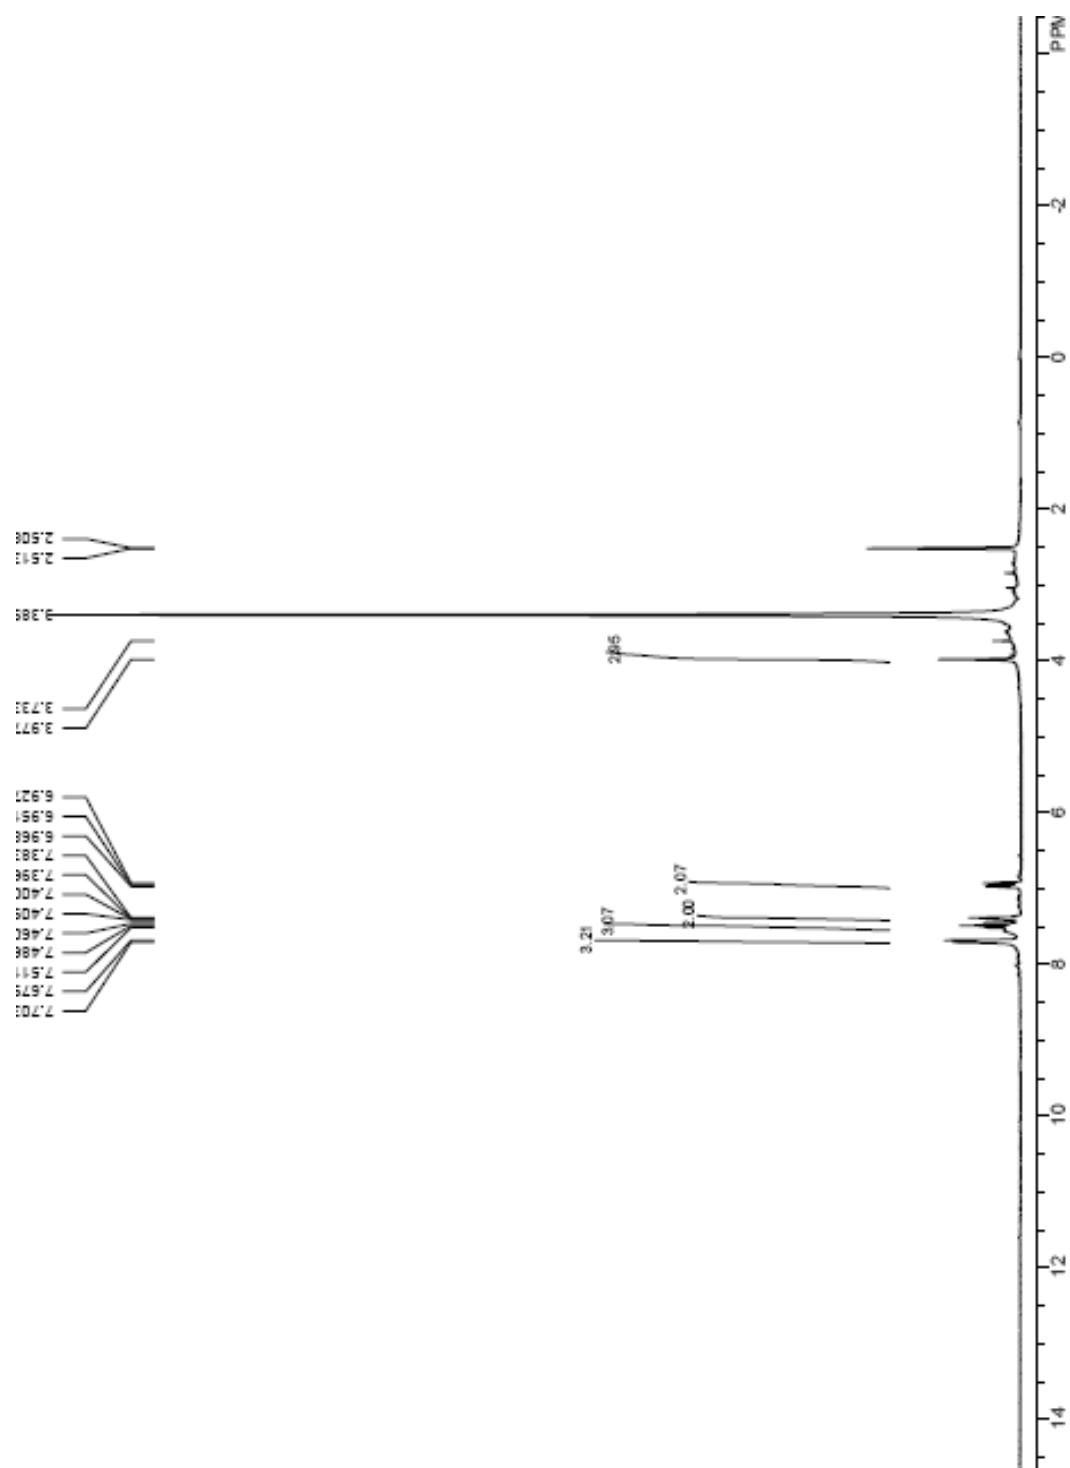

**2-Fluoro-5-(5-((1-(4-nitrophenyl)-3,5-dioxopyrazolidin-4-ylidene)methyl)furan-2-yl)benzoic**

acid (No. 1g).

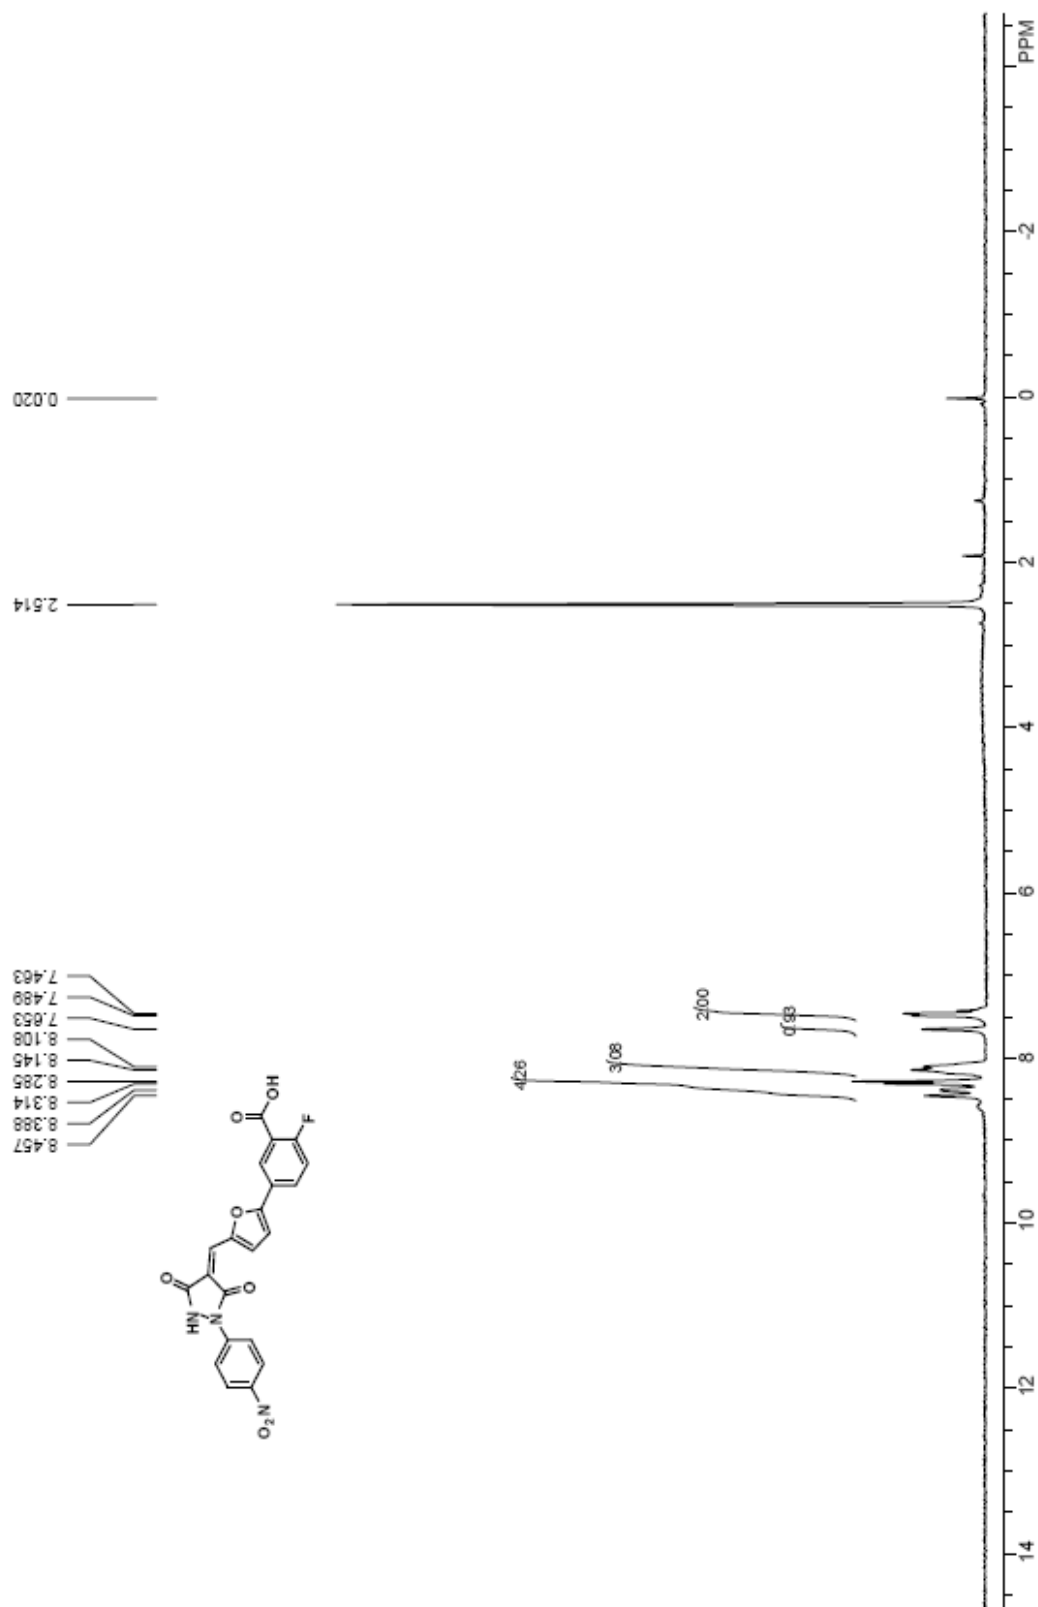

3-(5-((1-(4-(Methoxycarbonyl)phenyl)-3,5-dioxopyrazolidin-4-ylidene)methyl)furan-2-yl)-4-

**methylbenzoic acid (No. 1h).**

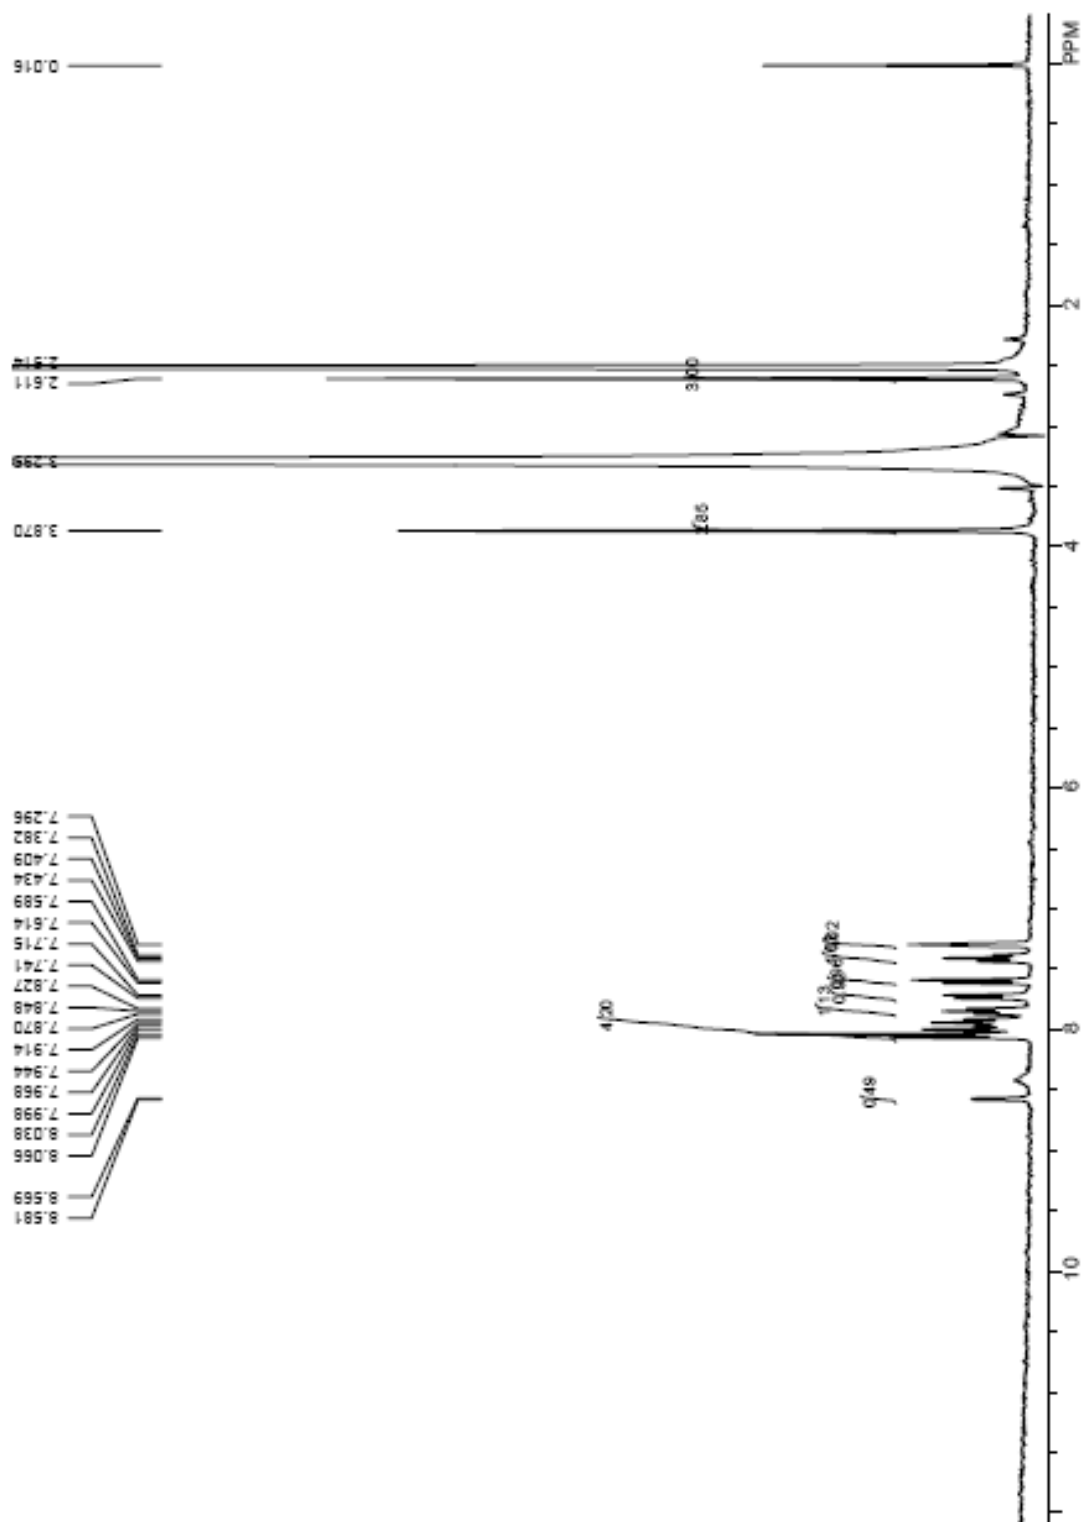

**3-(5-((1-(4-(Ethoxycarbonyl)phenyl)-3,5-dioxopyrazolidin-4-ylidene)methyl)furan-2-yl)-4-me**

thoxybenzoic acid (No. 1i).

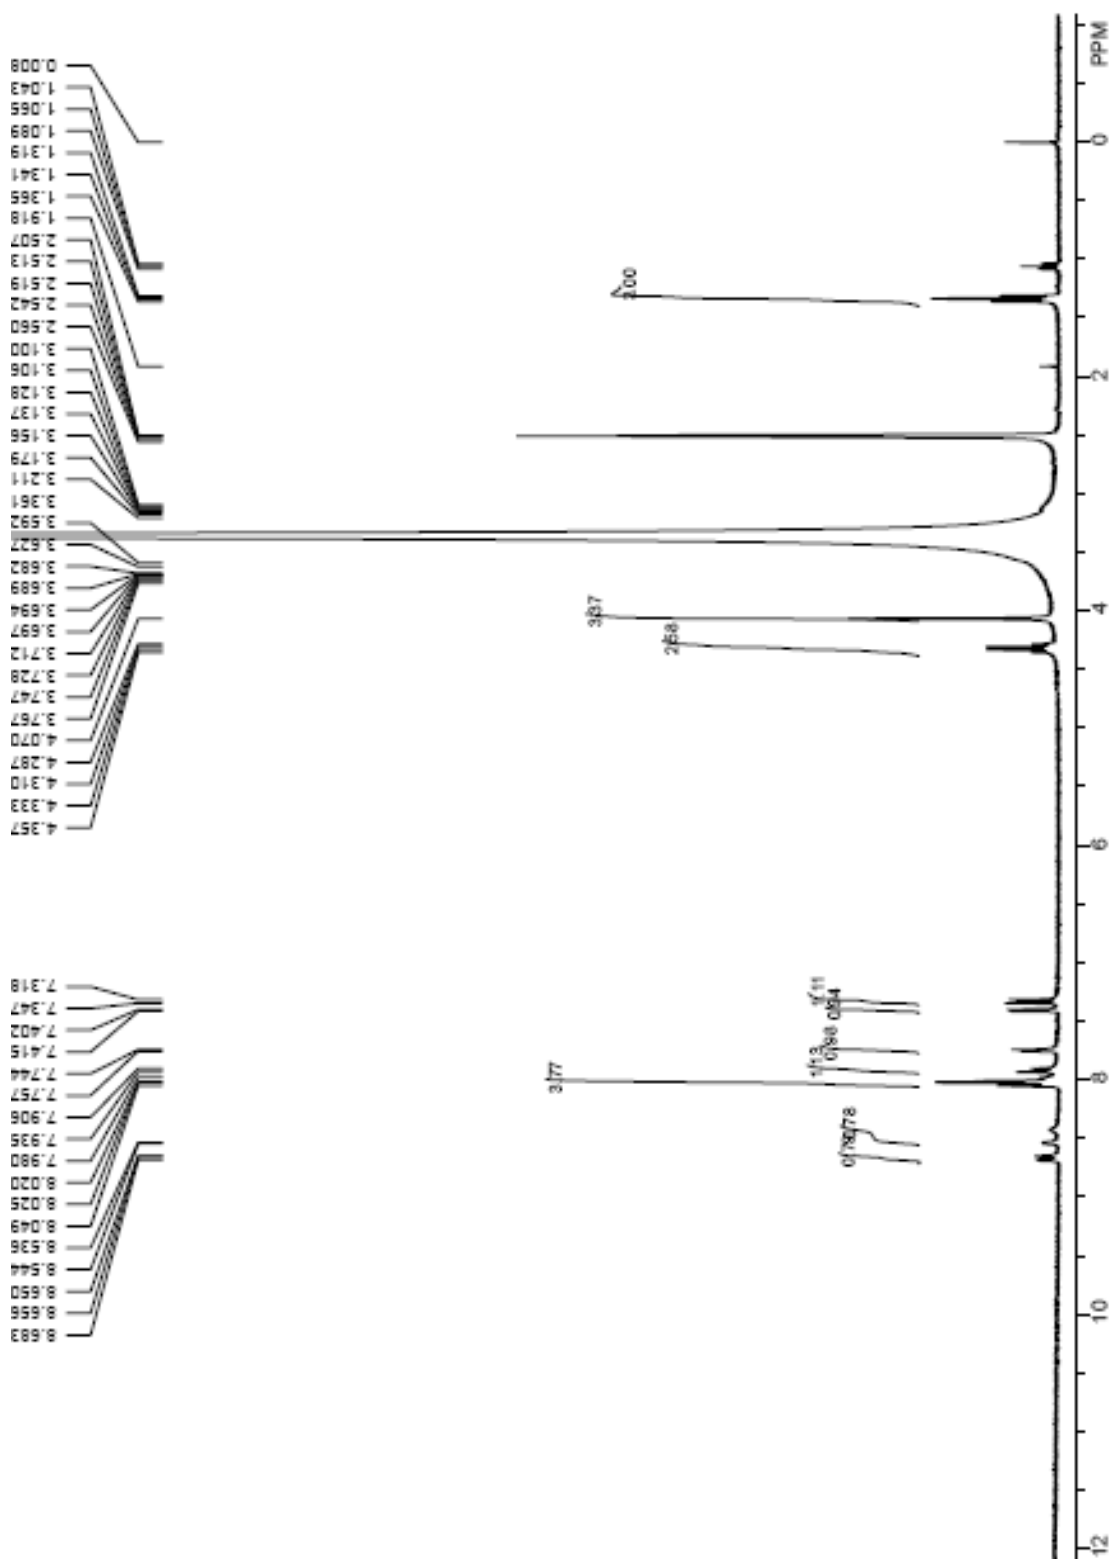

2-Chloro-5-(5-((3,5-dioxo-1-(m-tolyl)pyrazolidin-4-ylidene)methyl)furan-2-yl)ben

zoic acid (No. 1j).

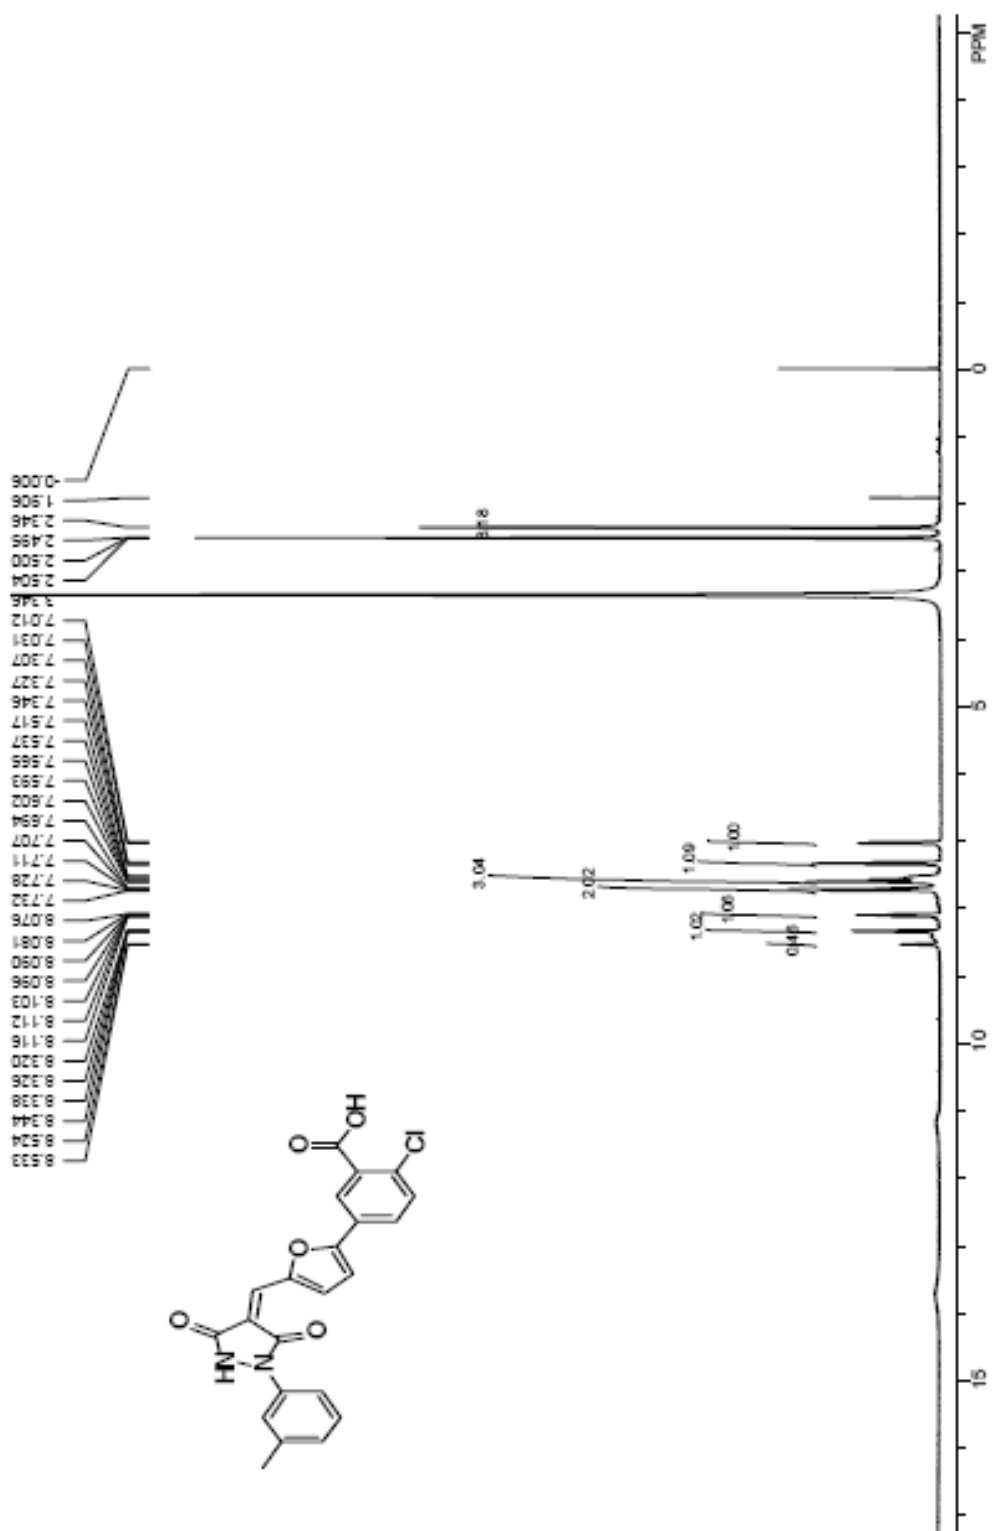

Methyl 4-(4-((5-(3-chlorophenyl)furan-2-yl)methylene)-3,5-dioxypyrazolidin-1-yl)benzoate

(No. 1k).

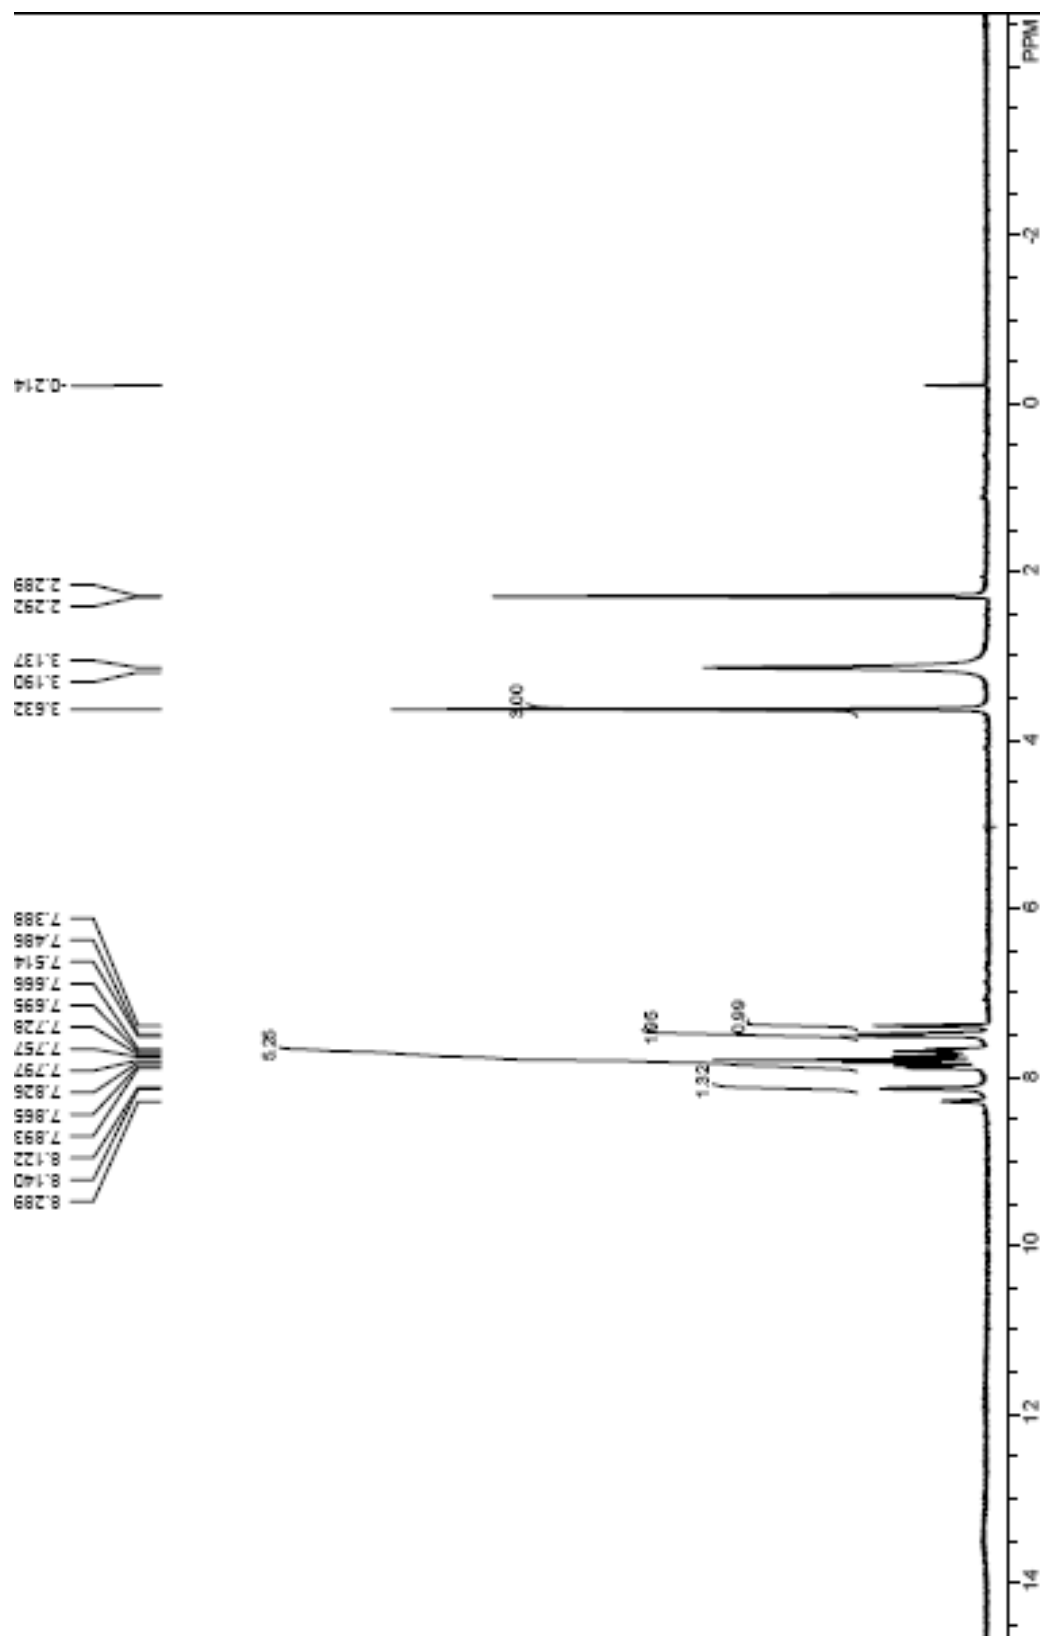

Methyl 4-(4-((5-(3-chloro-2-methylphenyl)furan-2-yl)methylene)-3,5-dioxopyra

**zolidin-1-yl)-benzoate (No. 1I).**

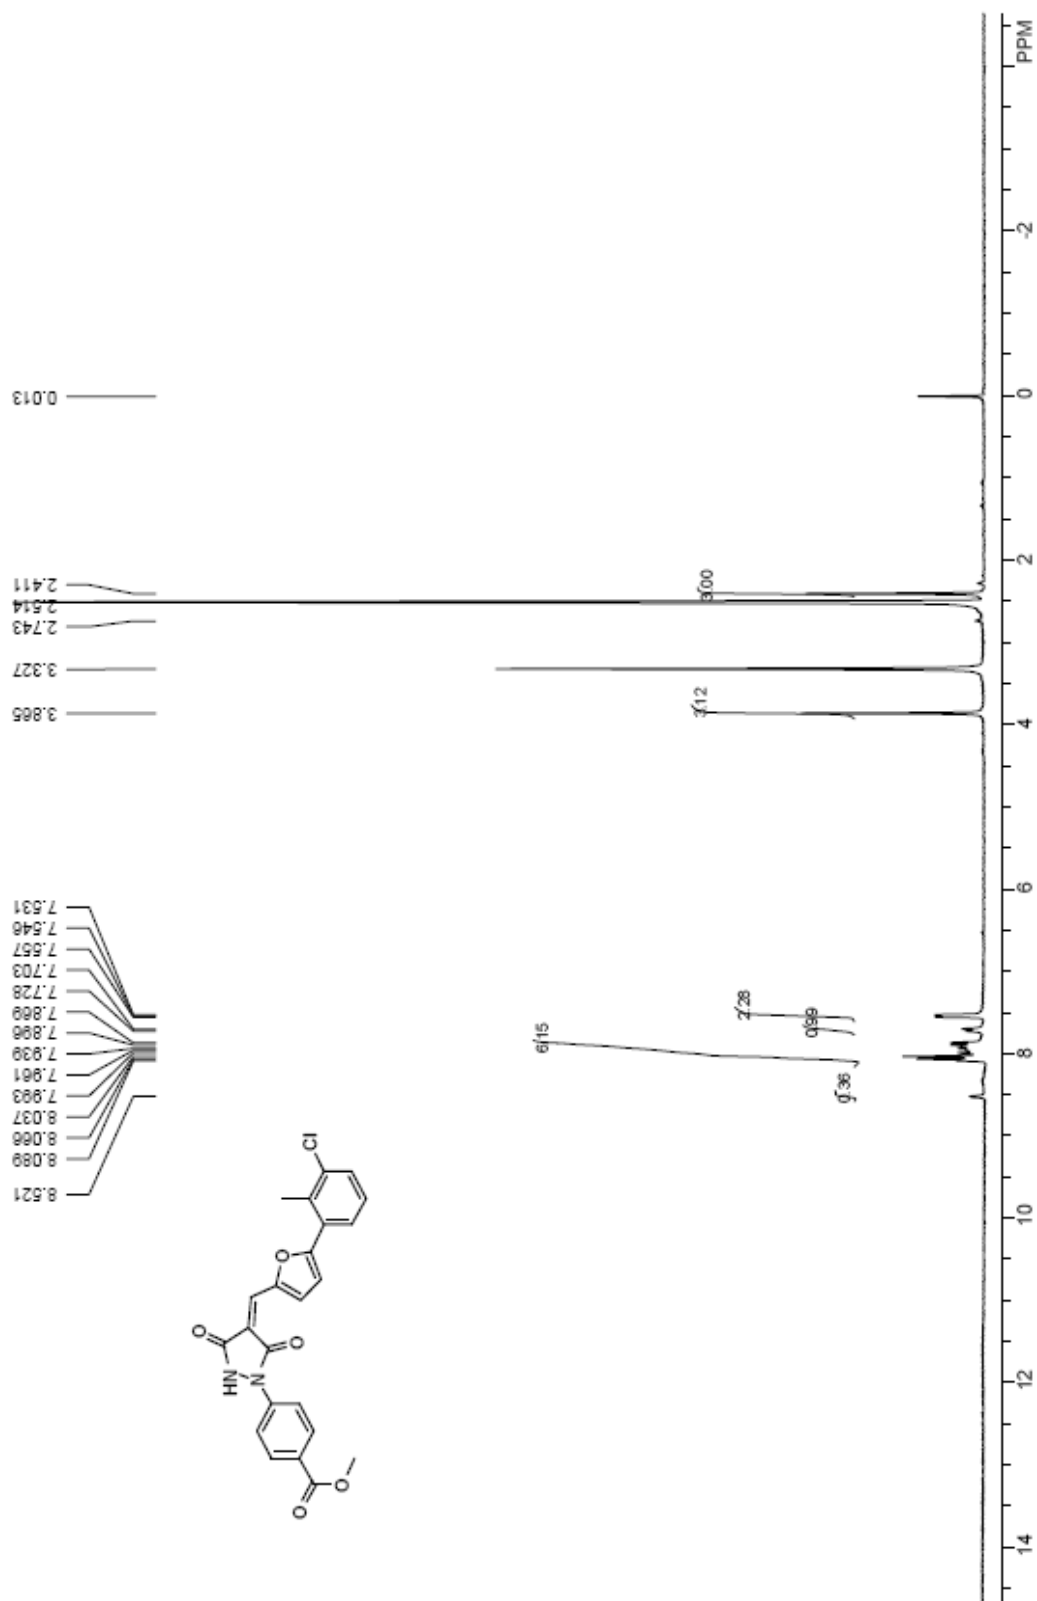

**Methyl 4-(3,5-dioxo-4-((5-(4-sulfamoylphenyl)furan-2-yl)methylene)pyrazolidin-1-yl)-**

benzoate (No. 1m).

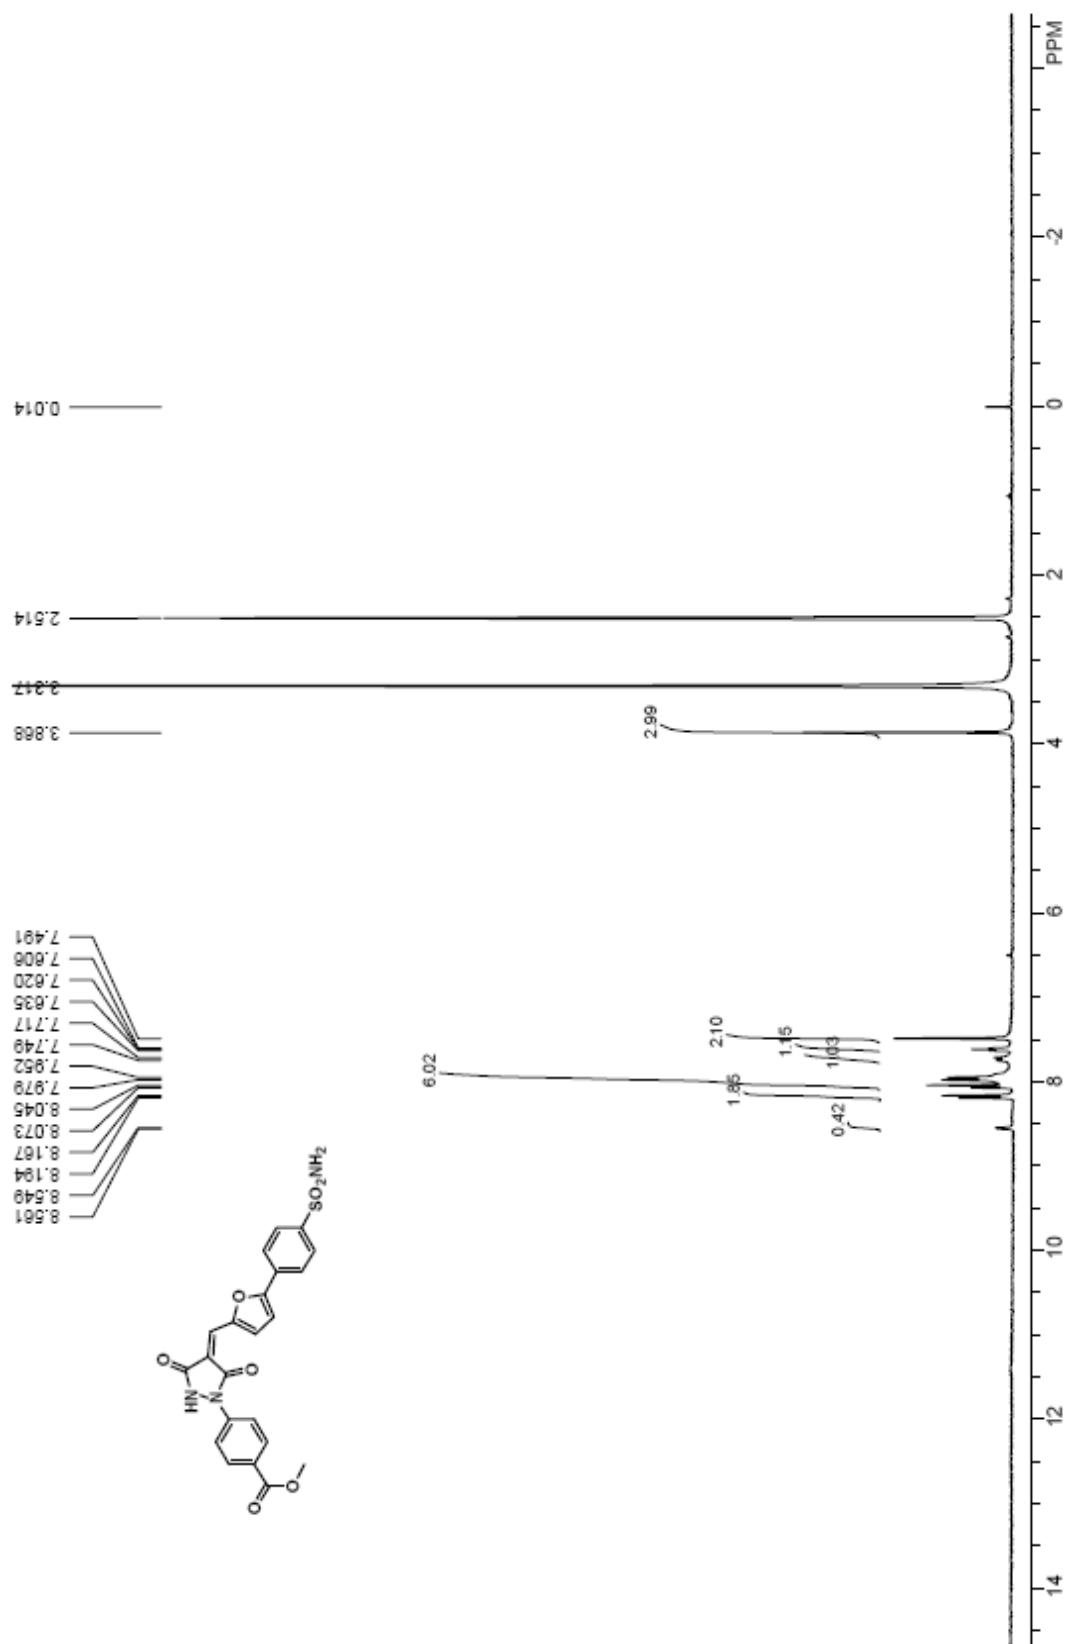

4-(5-((3,5-Dioxo-1-p-tolylpyrazolidin-4-ylidene)methyl)furan-2-yl)-N-(thiazol-2-yl)benzenesulfonamide



Ifonamide (No. 1n).

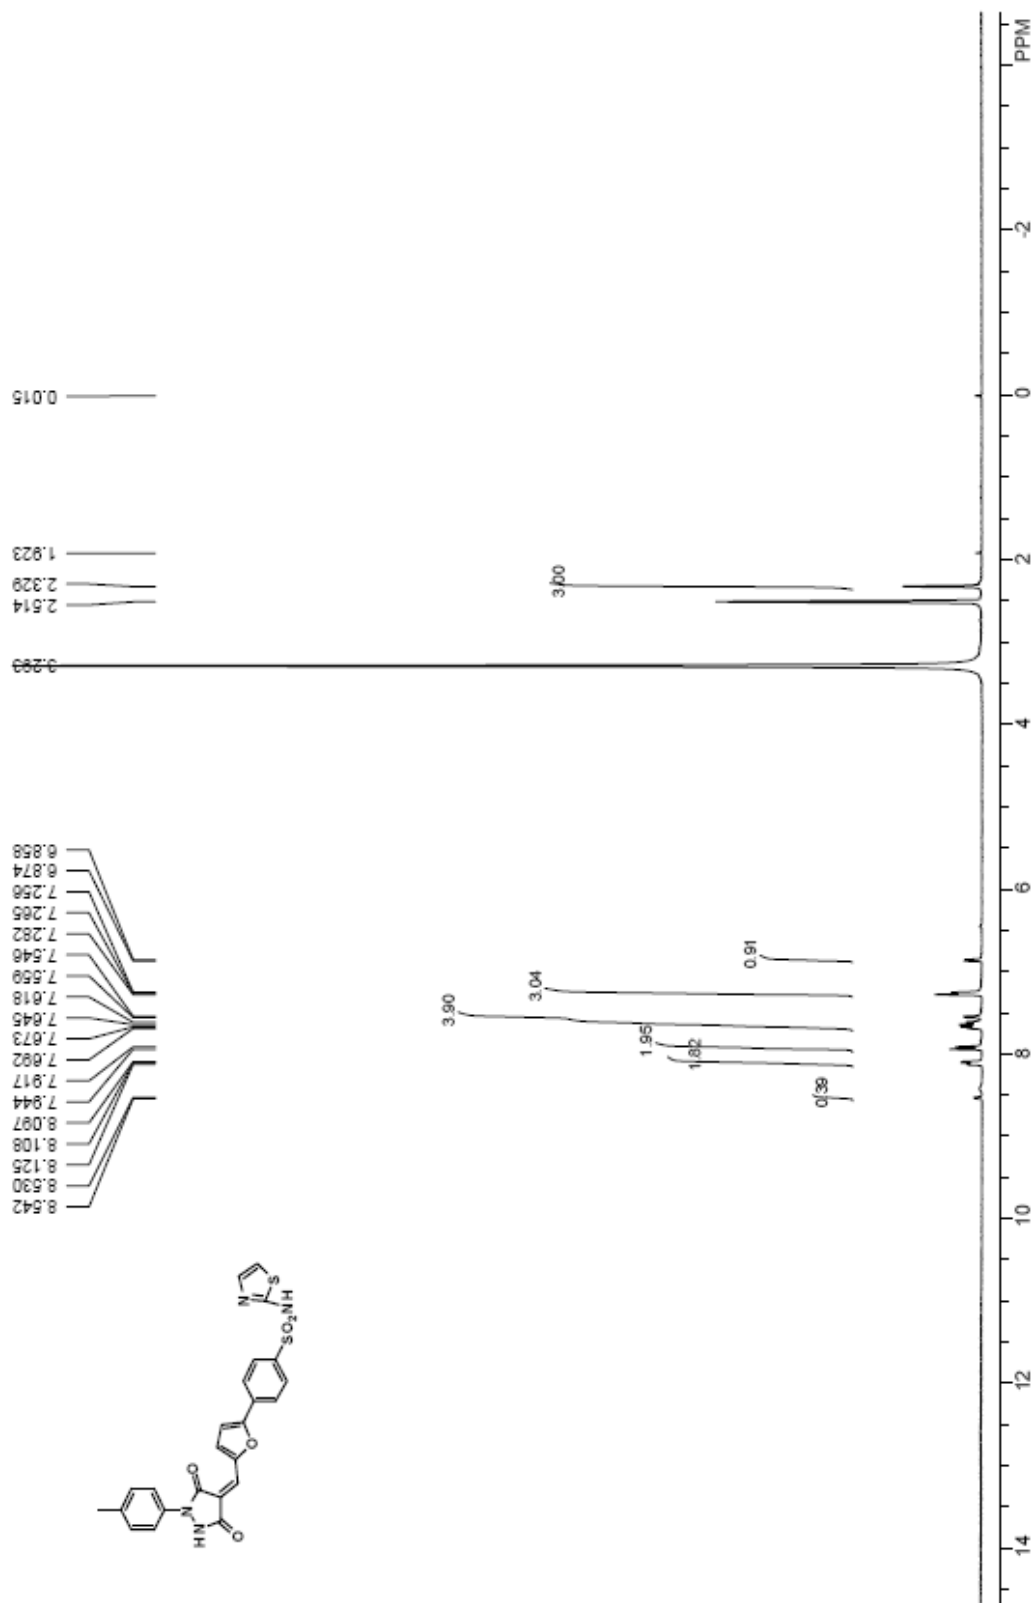

4-(5-((1-(3-Chloro-4-methylphenyl)-3,5-dioxopyrazolidin-4-ylidene)methyl)furan-2-yl)-N-(thi

azol-2-yl)benzenesulfonamide (No. 1o).

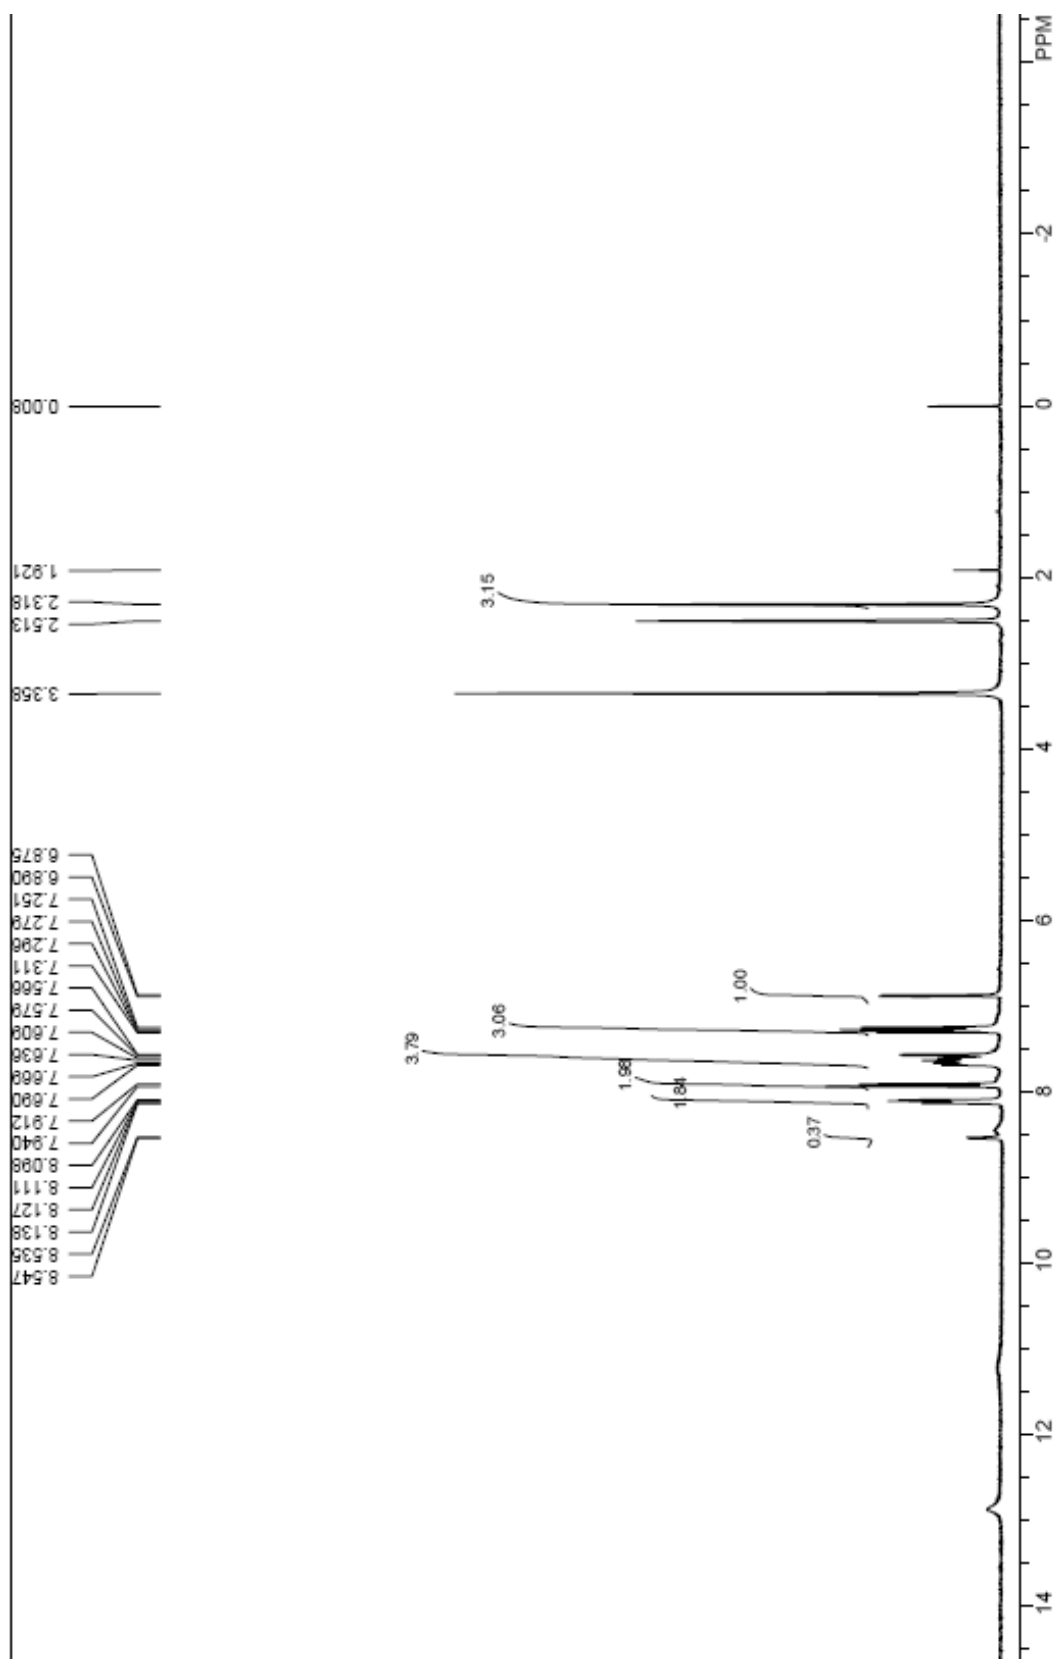

3'-((1-(4-(Ethoxycarbonyl)phenyl)-3,5-dioxopyrazolidin-4-ylidene)methyl)biphenyl-3-carbox

ylic acid (No. 1p).

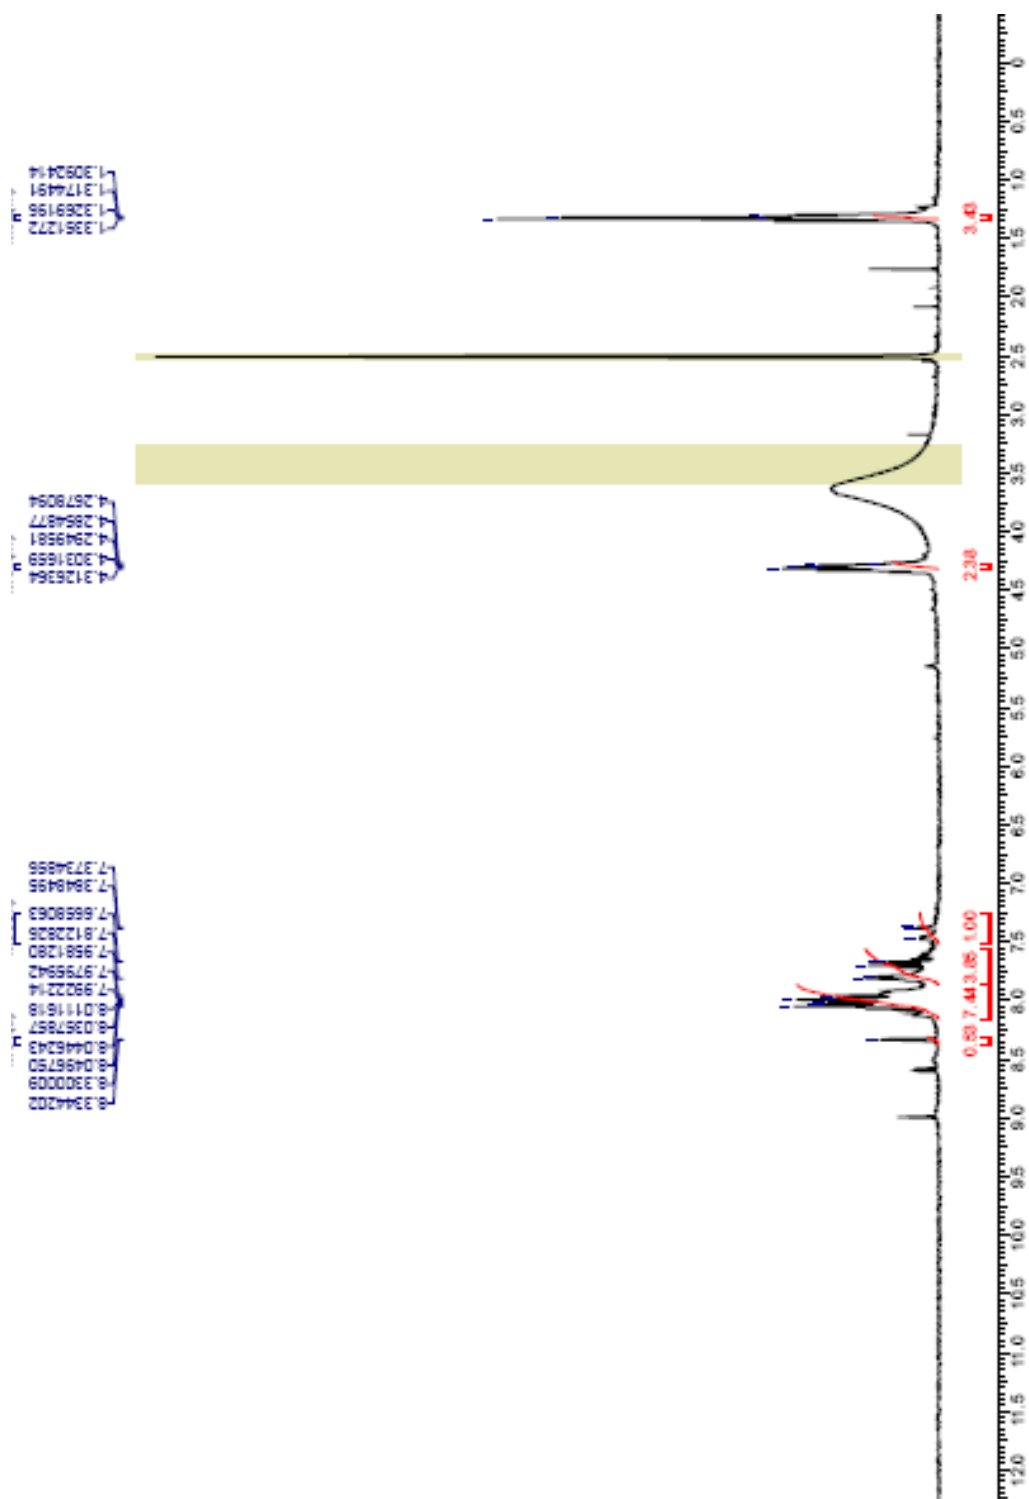

3'-((3-Ethoxy-1-(4-(ethoxycarbonyl)phenyl)-5-oxo-1H-pyrazol-4(5H)-ylidene)methyl)bipheny

1-3-carboxylic acid (No. 1q).

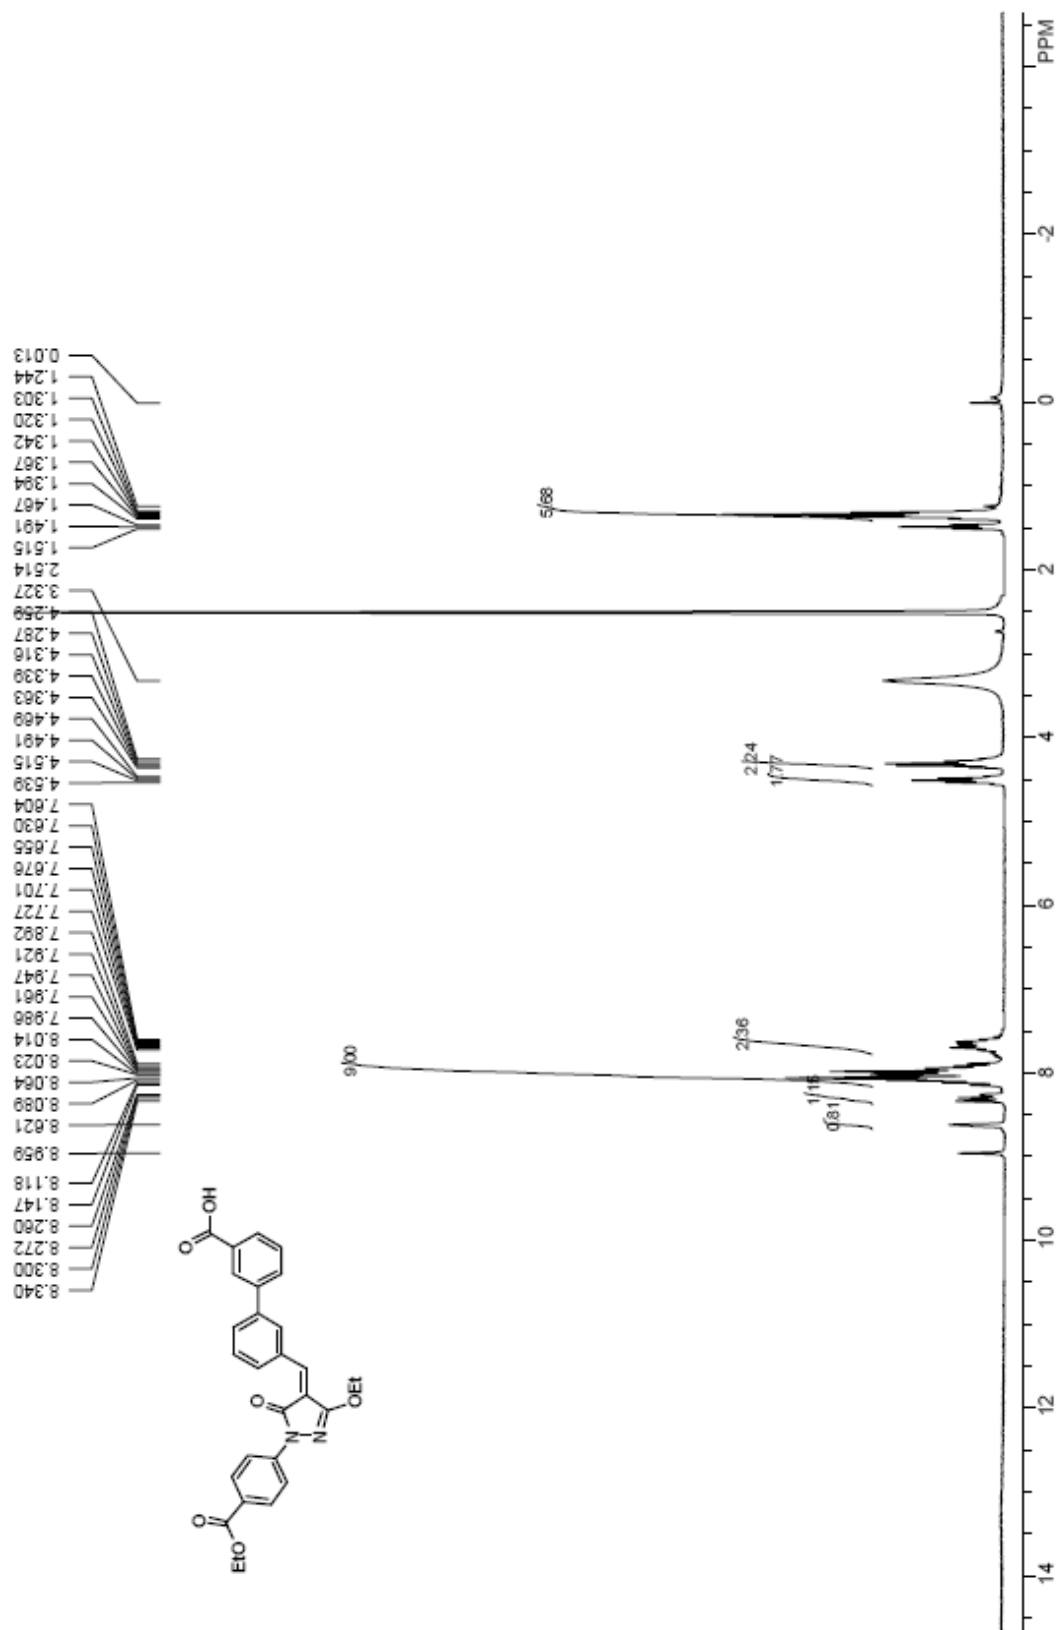

3-(5-((1-(4-(Methoxycarbonyl)phenyl)-3-methyl-5-oxo-1H-pyrazol-4(5H)-ylidene)methyl)fur-3-carboxylic acid (No. 1q).

an-2-yl)benzoic acid (No. 1r).

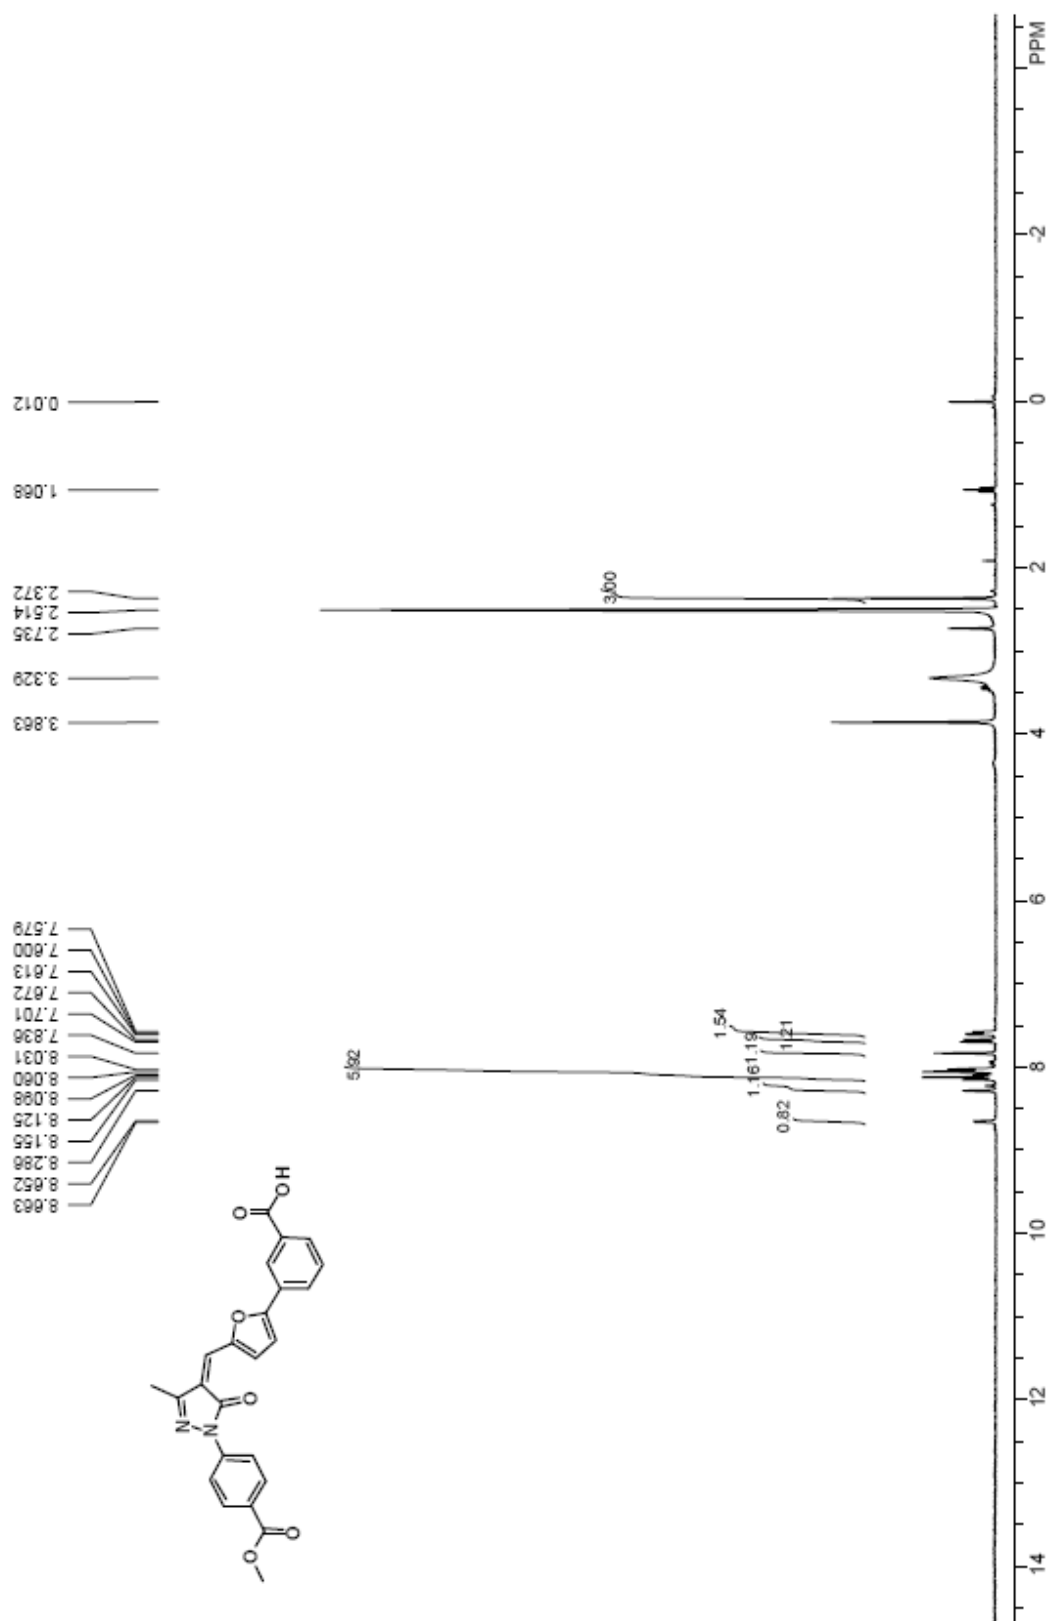

2-Fluoro-5-(5-((1-(4-(methoxycarbonyl)phenyl)-3,5-dioxypyrazolidin-4-ylidene)methyl)furan

-2-yl)benzoic acid (No. 5a).

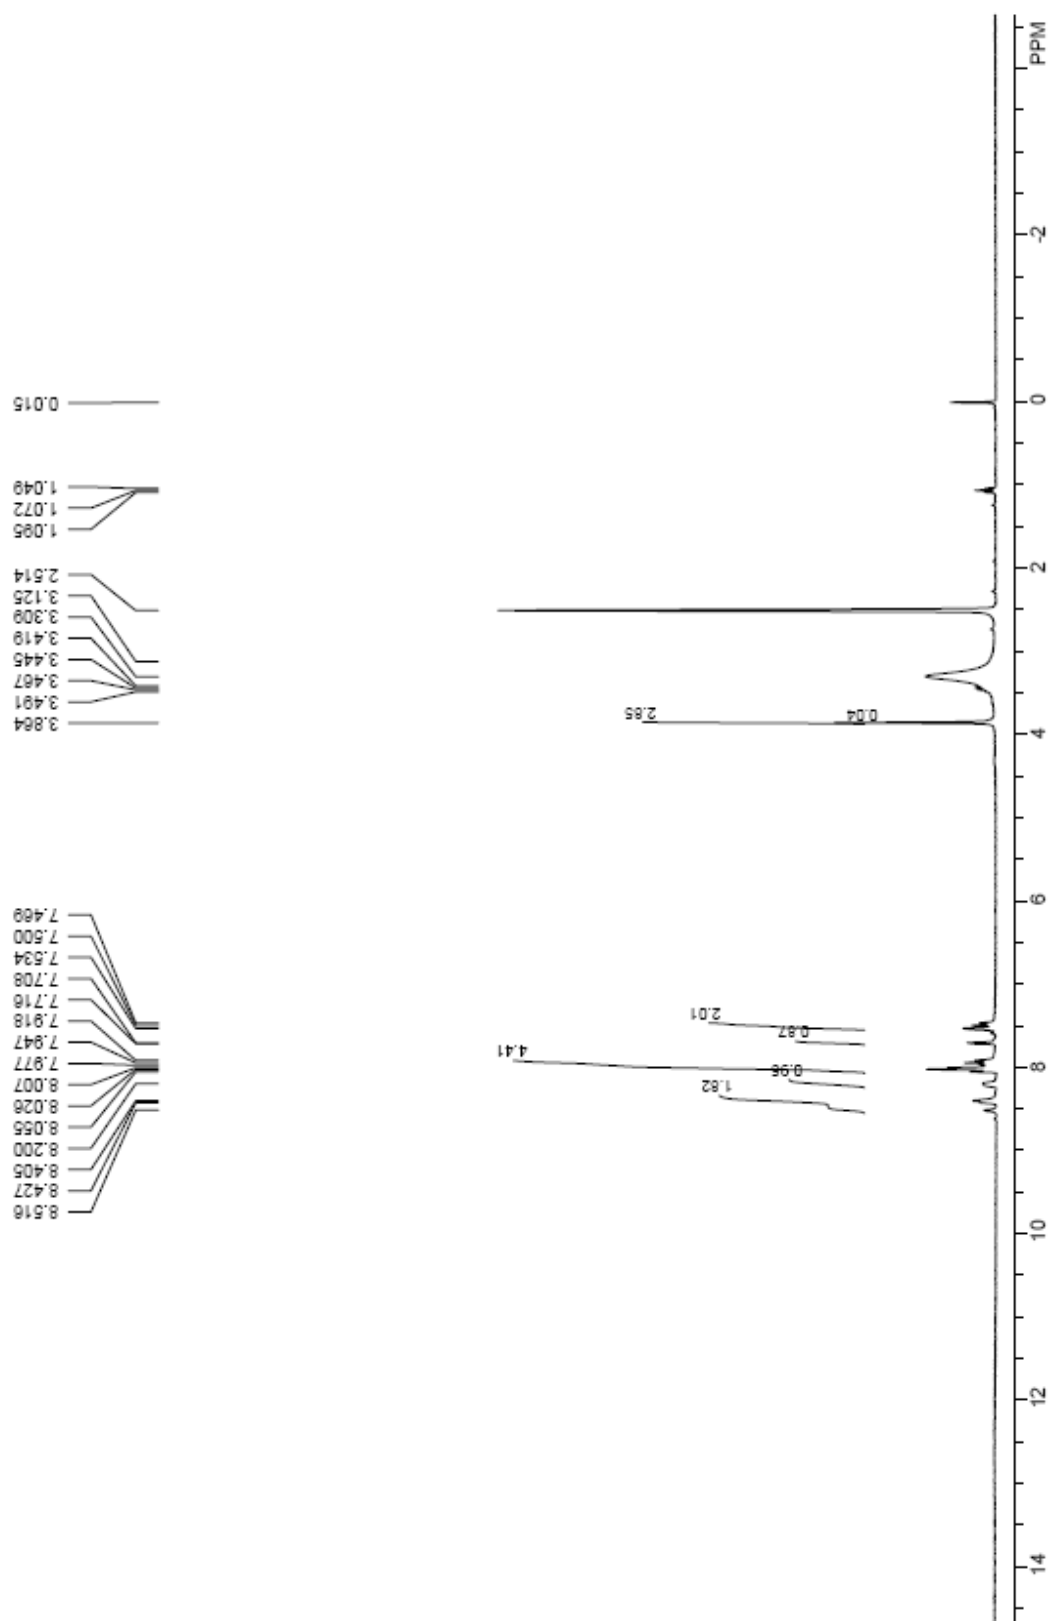

1-(3,4-Dimethylphenyl)-4-((5-(5-hydroxy-2-nitrophenyl)furan-2-yl)methylene)pyrazolidine-3

**,5-dione (No. 5b).**

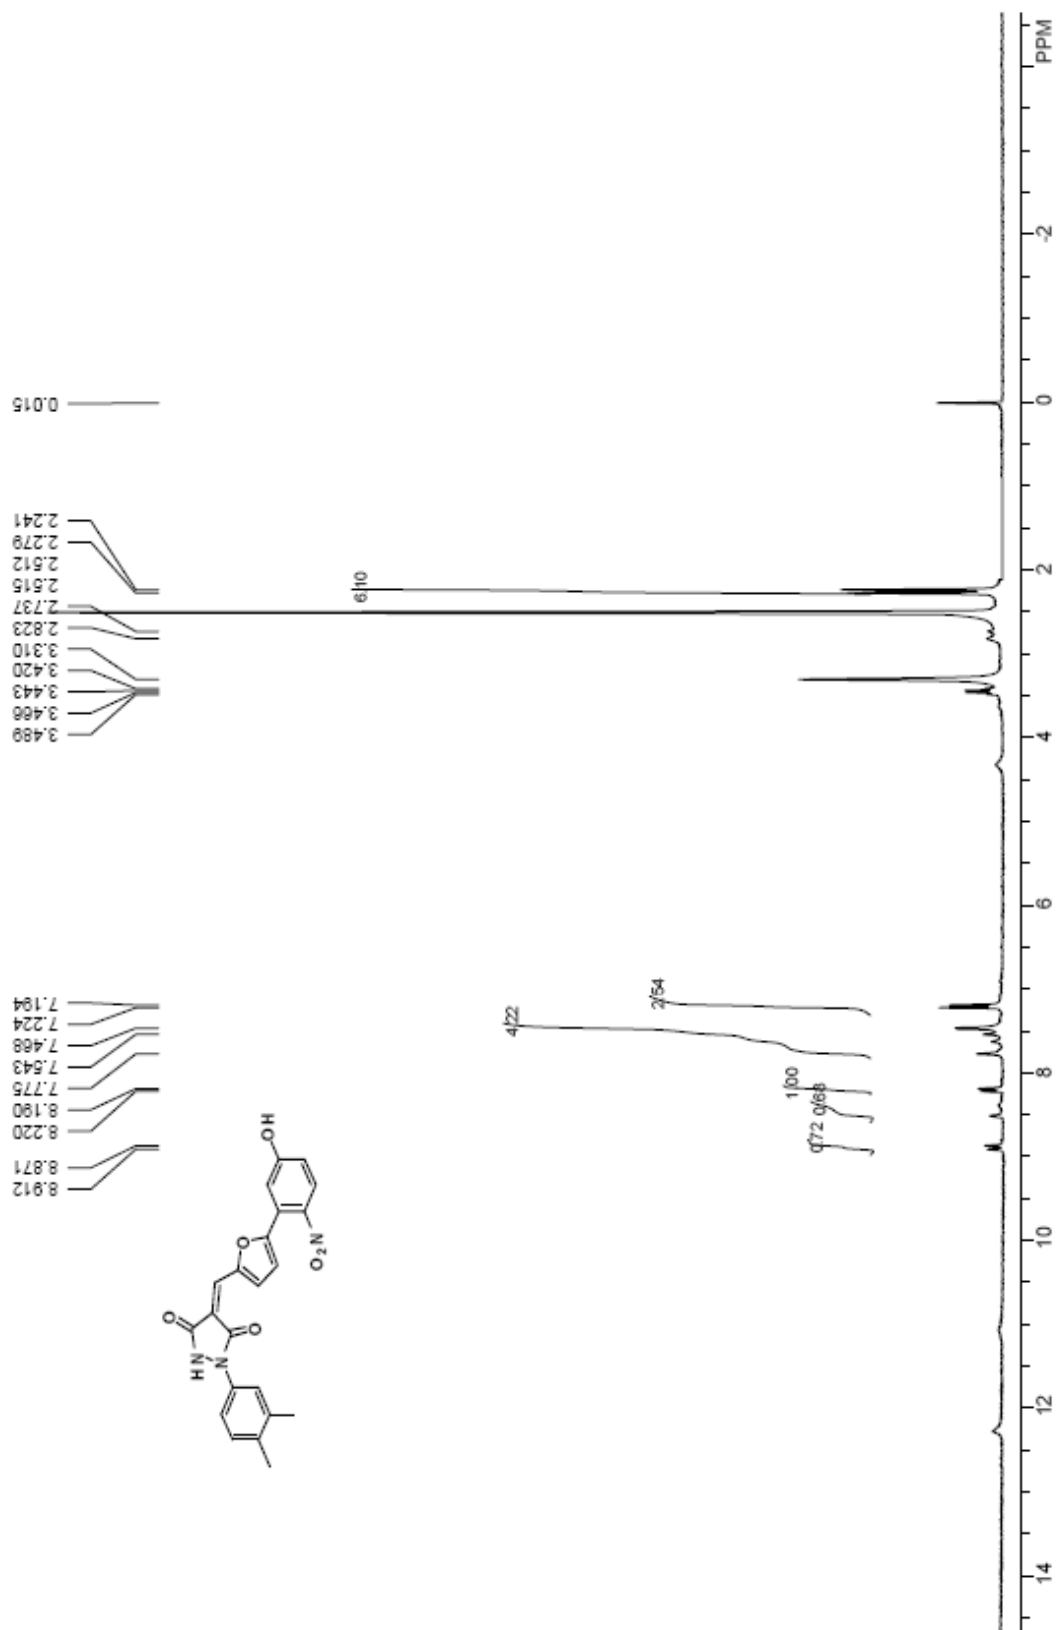

**Ethyl 4-(5-((1-(4-(methoxycarbonyl)phenyl)-3,5-dioxopyrazolidin-4-ylidene)methyl)furan-2-**

yl)benzoate (No. 5c).

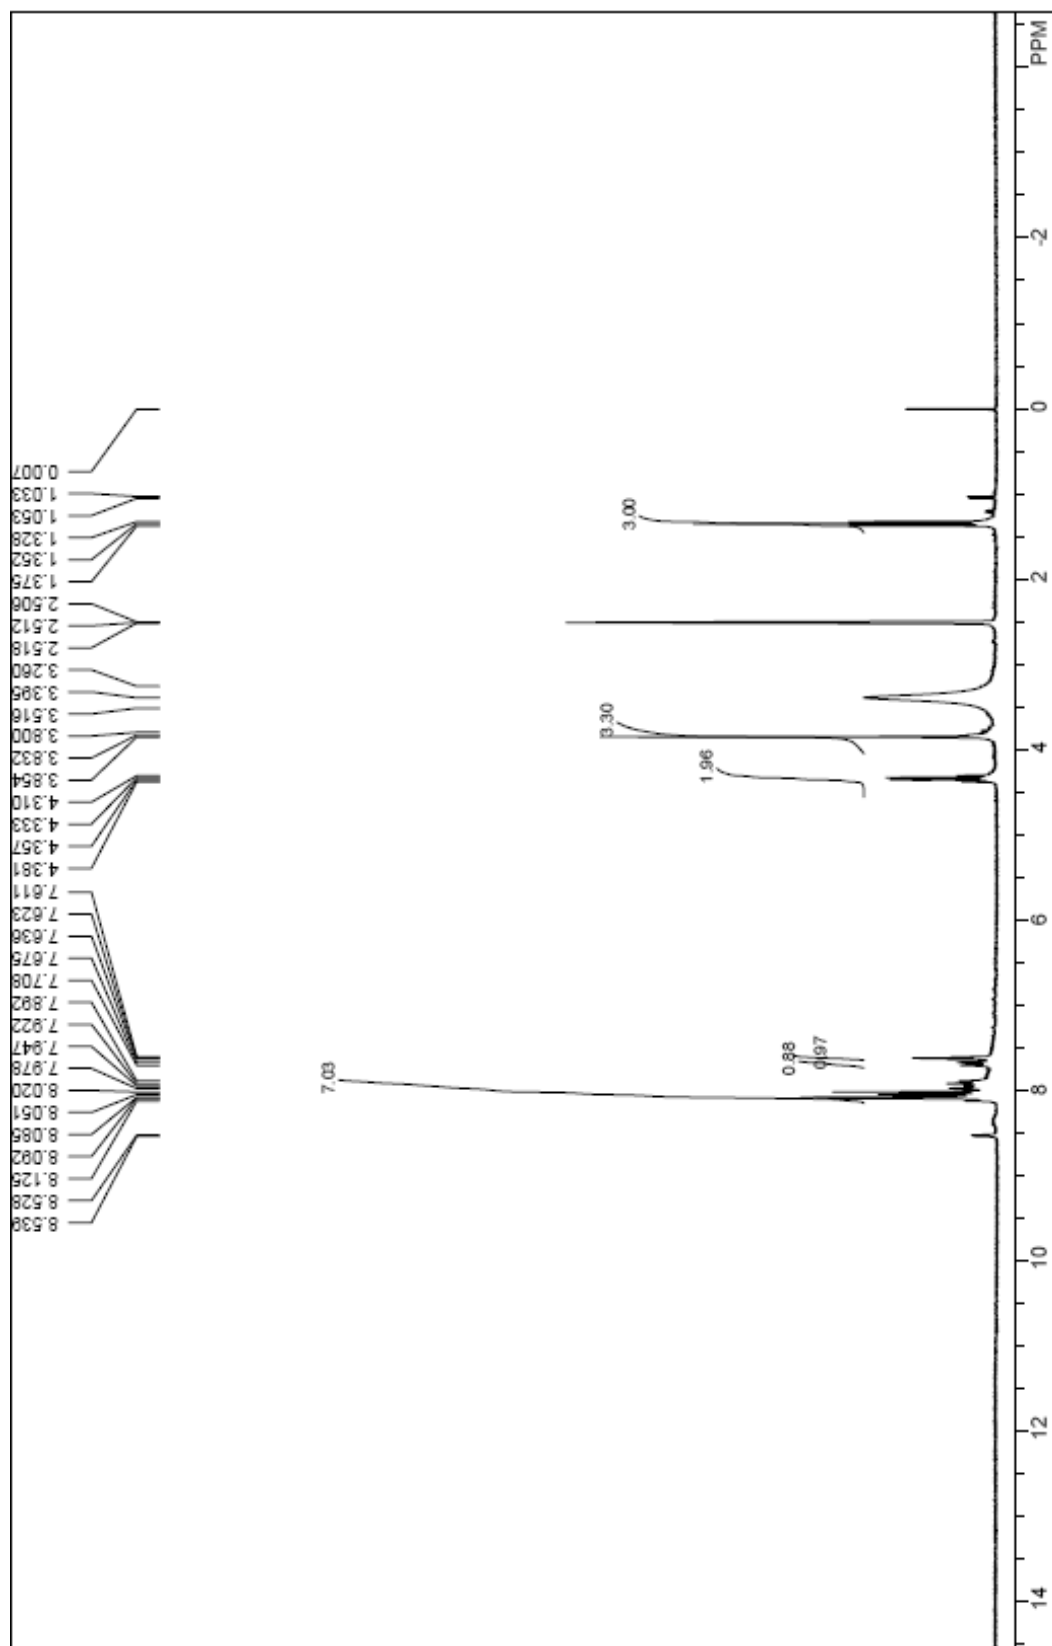

Methyl 3-(5-((1-(3,4-dimethylphenyl)-3,5-dioxopyrazolidin-4-ylidene)methyl)furan-2-yl)



benzoate (No. 5d).

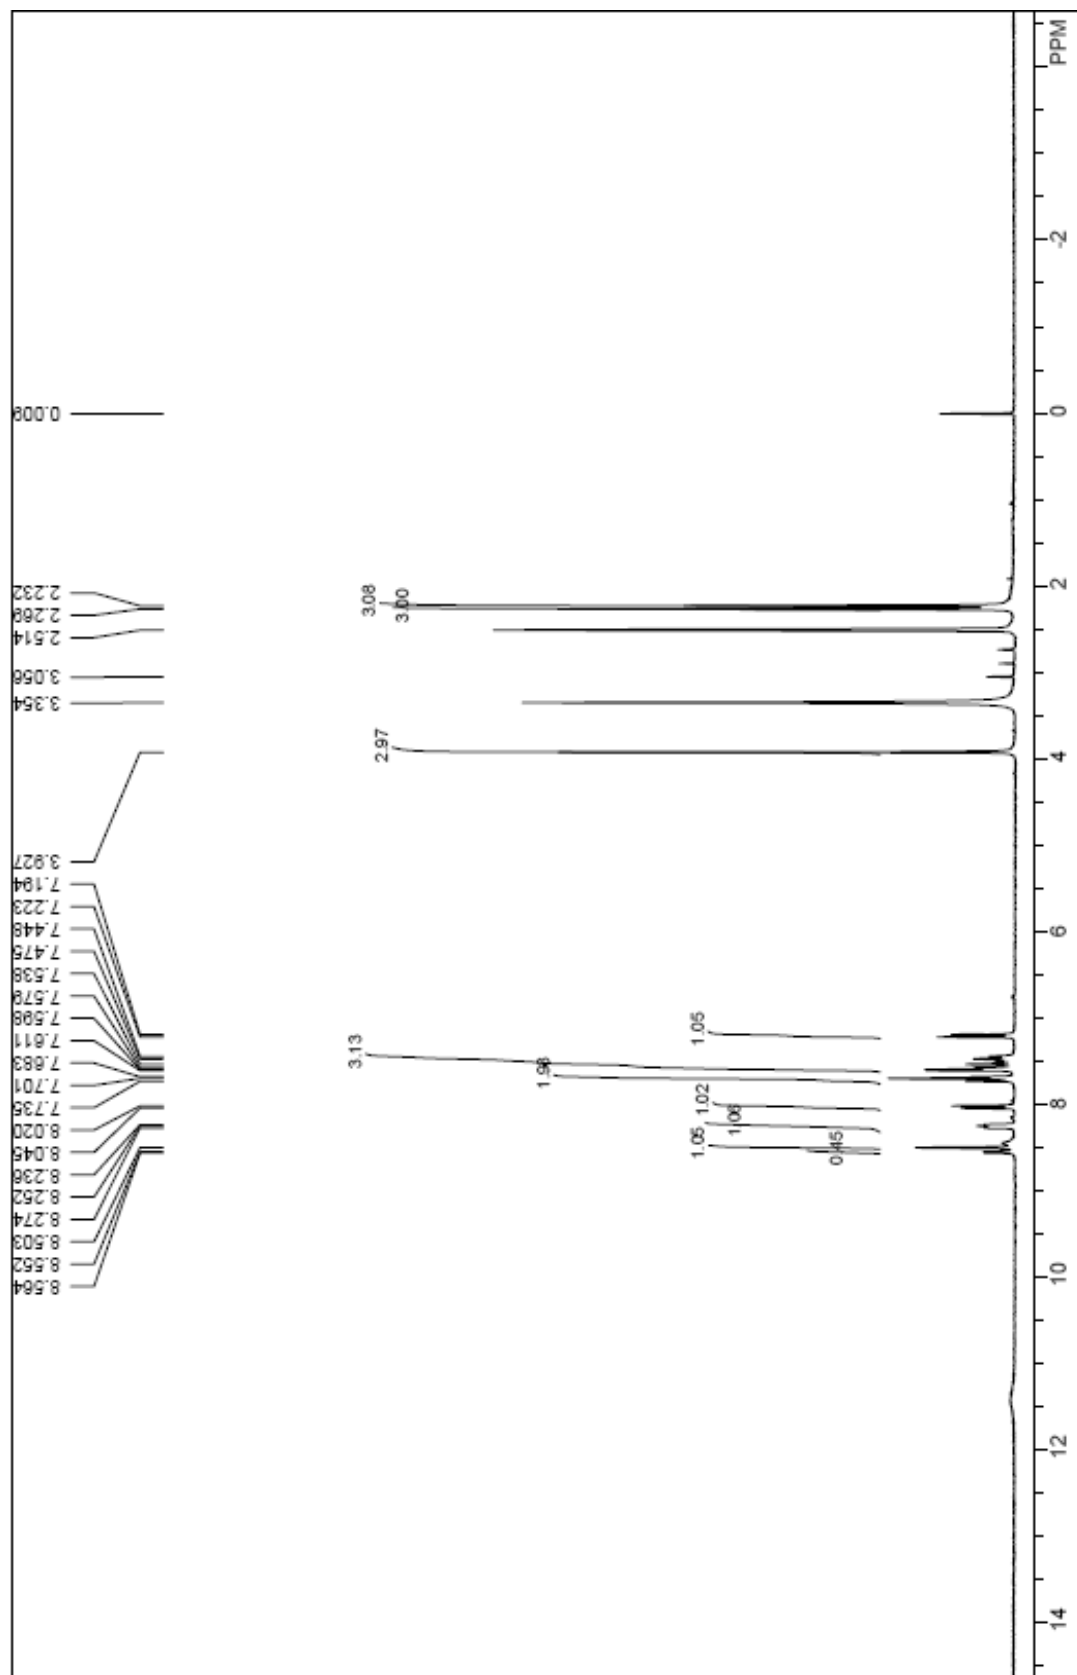

4-Methoxy-3-(5-((1-(4-(methoxycarbonyl)phenyl)-3,5-dioxypyrazolidin-4-ylidene)methyl)fur

an-2-yl)benzoic acid (No. 5e).

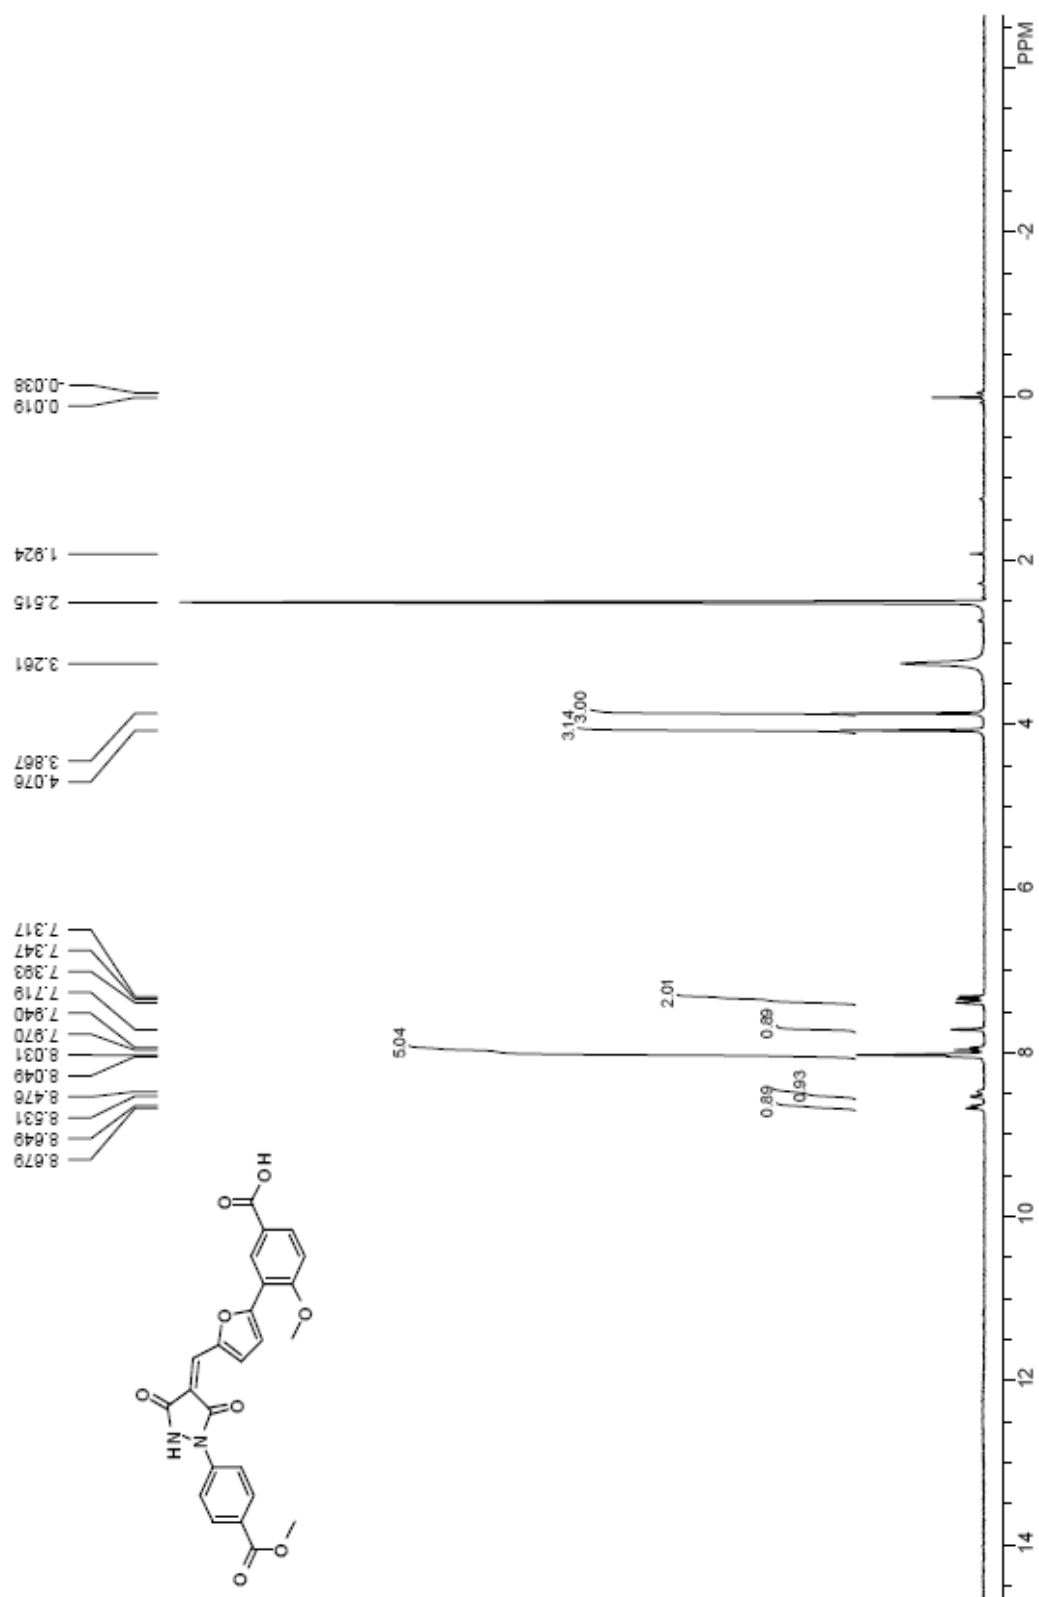

5-(5-((1-(4-(ethoxycarbonyl)phenyl)-3,5-dioxopyrazolidin-4-ylidene)methyl)furan-2-yl)-2-flu

orobenzoic acid (No. 5f).

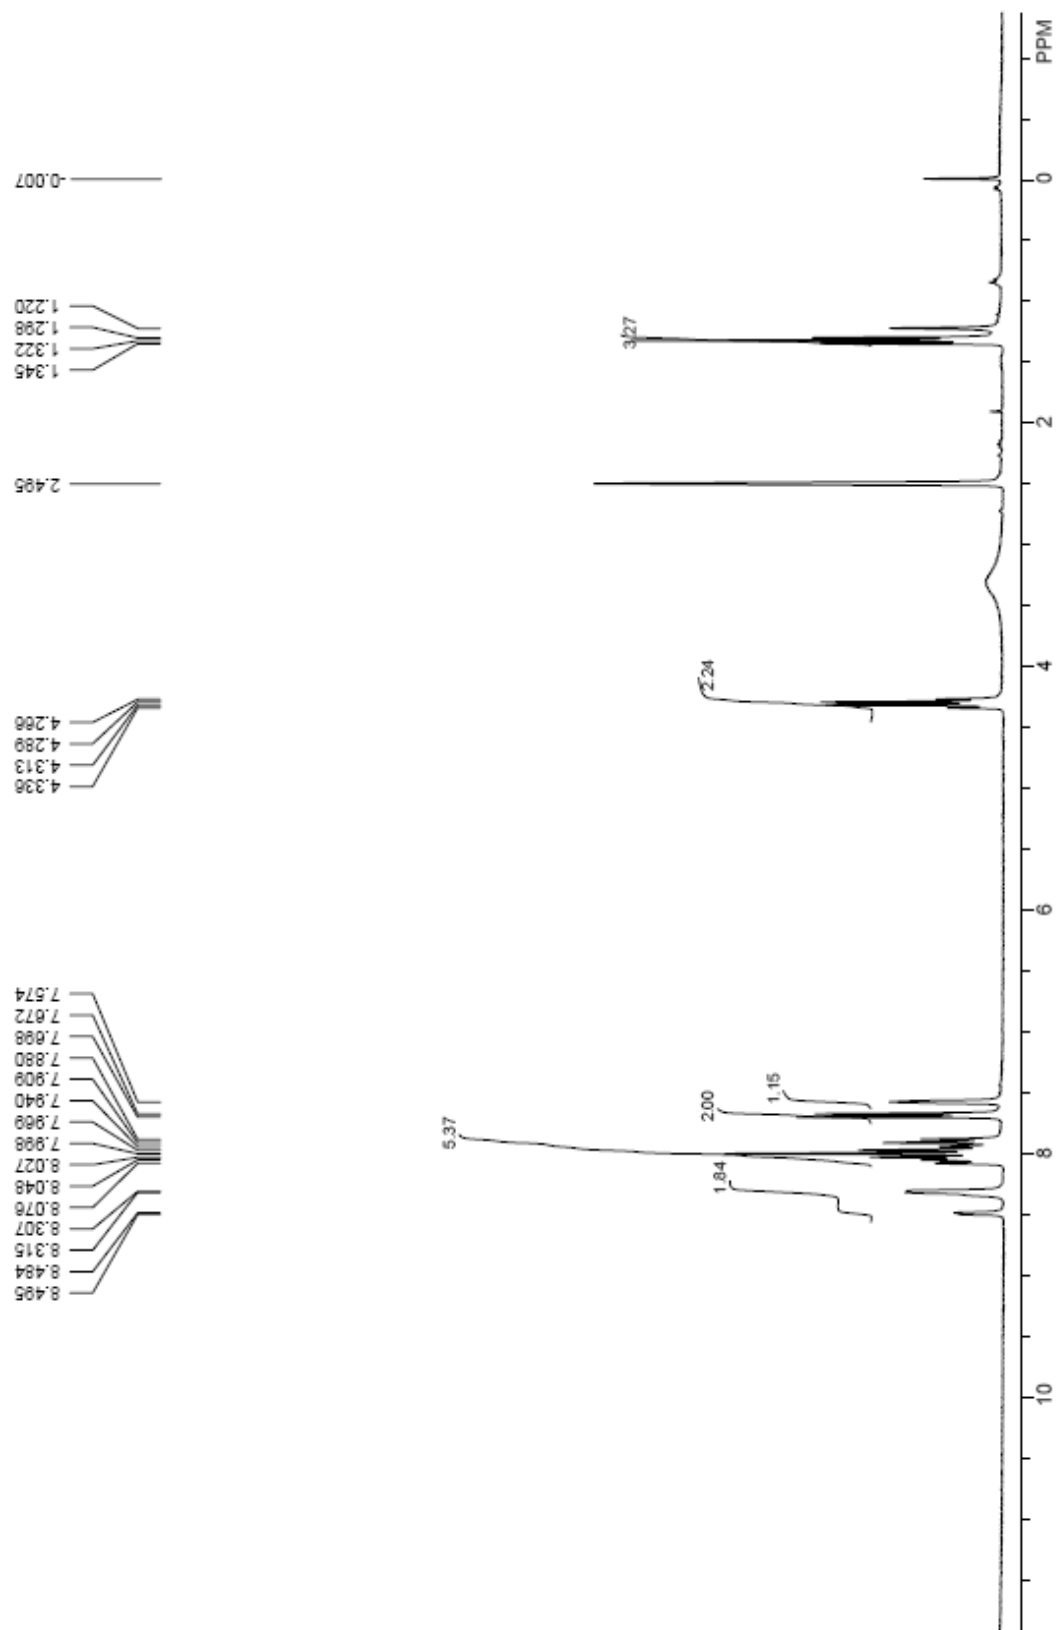

3'-((1-(4-(methoxycarbonyl)phenyl)-3,5-dioxopyrazolidin-4-ylidene)methyl)biphenyl-3-carbo

xylic acid (No. 5g).

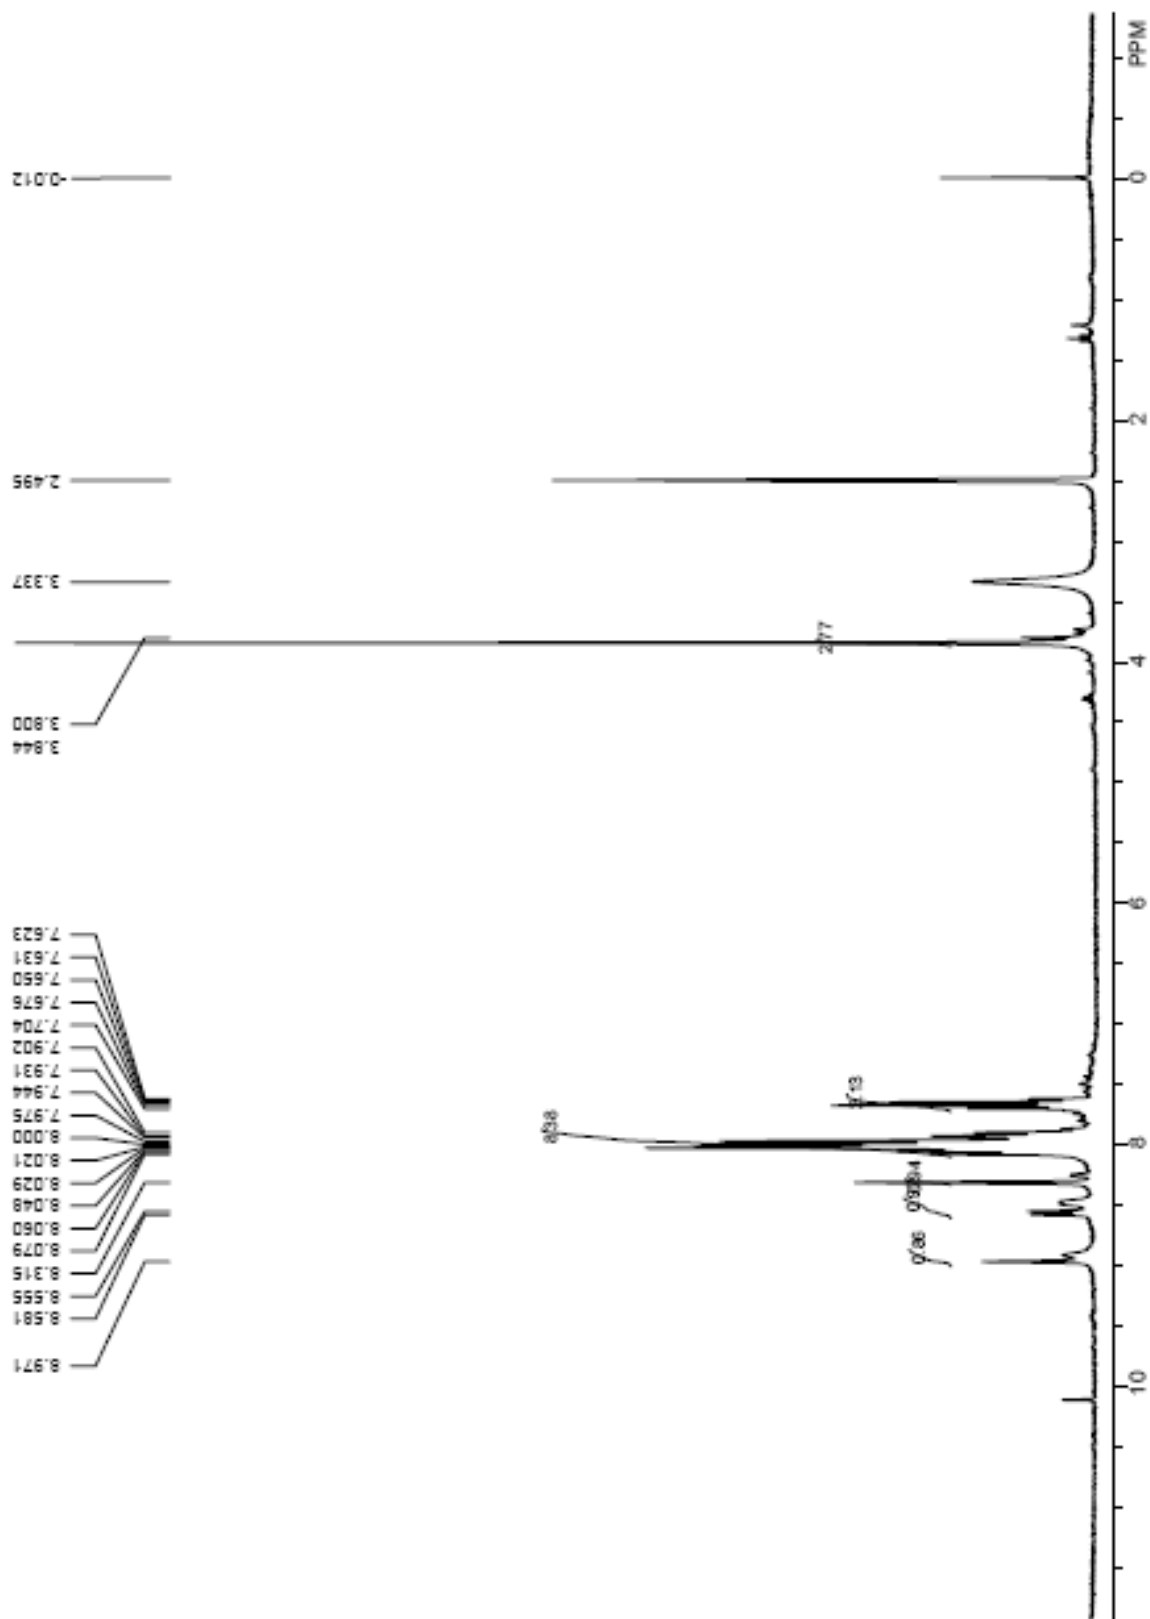

Supplement: c1ob06186k.pdf [file c1ob06186k.pdf]
